# Supplementary material for: Paths and pathways that generate cell-type heterogeneity and developmental progression in hematopoiesis
Source: eLife. 2021 Oct 29;10:e67516. doi: 10.7554/eLife.67516 (PMC8610493; doi:10.7554/eLife.67516)
Supplement: Figure 1—source data 1. [file elife-67516-fig1-data1.xlsx]

## Sheet: Figure 1D
	MZ			IZ			CZ
QC	21.1238	25.23	23.8792	4.58929	4.22473	5.34814	0.917046	1.00563	0.762904
mthl13	74.4456	33.7654	42.371	1.10491	0.820176	1.06971	0.0001	0.0168588	0.0001
Lst	48.9471	35.7989	42.0798	3.5978	2.73369	5.58583	2.08233	2.54743	2.28851
Ten-m	28.1898	22.2786	25.0979	106.05	88.2987	92.7462	1016.98	1149.34	1191.38
edl	2.09997	1.98334	2.6501	6.20401	4.62235	5.88295	15.7028	16.4572	17.1263
Sr-CI	103.844	99.1623	87.0133	486.455	466.698	525.475	1757.14	1820.52	1607.99
	MZ			IZ			CZ
QC (%)	90.2302	107.77	102	19.6031	18.0459	22.8446	3.91716	4.29554	3.25874
mthl13 (%)	148.316	67.2698	84.4145	2.20128	1.63401	2.13115	0.000199227	0.0335873	0.000199227
Lst (%)	115.782	84.6805	99.5376	8.51041	6.4664	13.213	4.92565	6.02582	5.41335
Ten-m (%)	2.51867	1.99052	2.24242	9.47524	7.88921	8.28658	90.864	102.69	106.446
edl (%)	12.7823	12.0724	16.1308	37.7631	28.1357	35.8088	95.5811	100.173	104.246
Sr-CI (%)	6.00758	5.73673	5.03389	28.1424	26.9994	30.3998	101.654	105.321	93.0254

## Sheet: Figure 1G
	PL				GFPLO CC				GFPHI CC
Hml	23759.6	21749.3	23089.8	24025.8	12473.2	11105.6	13439.1	10175.6	4978.58	5364.01	5540.57	5832.37
Pxn	9928.74	9853.16	9576.33	10374.6	5649	5976.66	6075.88	6285.96	2285.24	2429.72	2517.21	2713.68
Col4a1	17105.6	16956.7	17820	19815	8956.91	8862.61	9748.32	8178.14	2963.04	3299.29	3403.64	3604.66
vkg	10571.4	10751.3	11253.3	12391.3	6537.28	6592.03	7183.98	5720.8	2429.38	2631.08	2710.21	2792.79
NimC1	20.1545	23.5862	20.8473	20.5805	10.1334	13.3286	10.1491	15.1533	0.0001	0.0001	0.0001	0.0164491
GFP	4.97505	4.12464	4.78378	4.62245	2555.18	2026.4	2435.13	1664.07	3528.51	3629.92	3616.9	4053.23
PPO1	1632.36	1465.6	1682.74	1561.14	81592.8	76237.5	76360.5	66904.3	152389	154957	151433	141139
PPO2	1241.17	1156.29	1363.4	1101.77	93649.8	91285.5	90512	80549.7	220664	220143	216822	199815
	PL				GFPLO CC				GFPHI CC
Hml (%)	102.606	93.9246	99.7136	103.756	53.8657	47.9597	58.0369	43.9434	21.5001	23.1645	23.927	25.1872
Pxn (%)	99.955	99.1941	96.4072	104.444	56.8698	60.1685	61.1673	63.2823	23.0061	24.4606	25.3414	27.3193
Col4a1 (%)	95.4323	94.6016	99.418	110.548	49.9707	49.4446	54.386	45.6259	16.5308	18.4068	18.9889	20.1104
vkg (%)	94.0363	95.6366	100.102	110.225	58.1514	58.6384	63.904	50.8885	21.6102	23.4044	24.1083	24.8428
NimC1 (%)	94.6571	110.774	97.9108	96.6578	47.5922	62.5987	47.666	71.1686	0.000469657	0.000469657	0.000469657	0.0772544
GFP (%)	0.134202	0.111262	0.129042	0.12469	68.9259	54.6621	65.6876	44.8882	95.1815	97.917	97.5658	109.336
PPO1 (%)	1.08839	0.9772	1.12198	1.0409	54.4026	50.8319	50.914	44.609	101.607	103.319	100.969	94.1055
PPO2 (%)	0.579009	0.539412	0.63603	0.513979	43.6879	42.5849	42.2241	37.5767	102.94	102.697	101.148	93.2143

## Sheet: Figure 1I
	iCC				mCC
FSC	111452	110496	102982	100586	120690	123672	115785	118741
SSC	115572	109323	111055	108795	140337	139814	130051	129119

## Sheet: Figure 1-figure supplement 1D
	PL				GFPLO CC				GFPHI CC
DsRed	160.557	155.502	167.41	147.648	14.5769	23.5076	26.1265	35.7214	0.953818	0.585204	0.411025	0.408827
eater	1259.86	1352.4	1359.77	1554.47	362.191	392.492	463.895	427.113	28.7623	32.9665	34.6239	53.7559
GFP	4.97505	4.12464	4.78378	4.62245	2555.18	2026.4	2435.13	1664.07	3528.51	3629.92	3616.9	4053.23
lz	9.74631	8.43981	9.8839	9.40198	427.499	434.567	439.602	336.951	515.794	509.38	515.965	421.074
hnt	31.9722	27.3988	27.9201	29.2592	1422.76	1505.53	1337.2	1134.54	1088.81	1280.3	1162.92	1244.77
	PL				GFPLO CC				GFPHI CC
DsRed (%)	101.76	98.5567	106.104	93.5788	9.23879	14.899	16.5589	22.6401	0.604527	0.370901	0.260506	0.259113
eater (%)	91.1868	97.8847	98.4182	112.51	26.2149	28.408	33.576	30.9138	2.08177	2.38607	2.50603	3.89077
GFP (%)	0.134202	0.111262	0.129042	0.12469	68.9259	54.6621	65.6876	44.8882	95.1815	97.917	97.5658	109.336
lz (%)	1.9868	1.72047	2.01485	1.91661	87.1463	88.5871	89.6135	68.688	105.145	103.838	105.18	85.8366
hnt (%)	2.3683	2.02953	2.06814	2.16734	105.389	111.52	99.0513	84.0395	80.6522	94.8365	86.1417	92.2047
