# Supplementary material for: Paths and pathways that generate cell-type heterogeneity and developmental progression in hematopoiesis
Source: eLife. 2021 Oct 29;10:e67516. doi: 10.7554/eLife.67516 (PMC8610493; doi:10.7554/eLife.67516)
Supplement: Figure 2—source data 1. [file elife-67516-fig2-data1.xlsx]

## Sheet: Figure 2E
Gene ID	Fold change (log2 IZ vs. proPL)	FDR (-log10 IZ vs. proPL)
Chmp1	1.79957	300
CtsB1	1.60961	300
Idgf6	1.39421	300
Cyp1	-1.25271	300
awd	-1.27538	300
CG42394	-2.08274	300
RnrS	-4.49852	300
dnk	-4.61071	300
Ts	-4.72037	300
RnrL	-6.13803	300
PCNA	-6.64591	300
Claspin	-8.64769	300
stg	-9.32483	300
Keap1	1.82566	300
CHMP2B	1.83833	298.191
Spn55B	2.1821	292.738
GstE1	2.17065	273.22
RPA2	-2.89022	269.045
CG15098	1.31285	254.324
Jafrac1	-1.48077	244.588
Mcm5	-5.80585	241.71
CG30090	2.08841	241.332
Caf1-180	-3.98751	240.665
sesB	-1.28533	240.194
spict	1.59862	238.832
Mcm7	-4.3555	237.443
CG31777	-1.76455	235.073
Rel	1.47696	227.342
Df31	-1.41289	226.876
Jra	1.53648	216.029
WRNexo	-4.53626	214.592
Naa40	-3.3058	213.073
Ppn	-2.00308	210.875
CG8066	2.02603	210.76
schlank	1.34175	210.595
GstD1	1.29213	210.023
CG10336	-5.76277	209.238
puc	1.43112	204.831
CG2444	1.98281	202.589
NijA	1.65689	201.643
GlcT	1.78098	199.978
mt:CoI	-1.15906	198.679
Mcm3	-4.67189	195.396
CG43236	1.98752	195.253
His2Av	-1.37159	190.03
CG6701	1.57824	188.291
CG42369	1.79561	187.337
GstE2	1.75292	185.019
Rack1	1.0914	184.301
ATPsynG	-1.18867	183.945
MESK2	1.55213	182.345
Fkbp12	-1.21072	181.796
pAbp	1.13983	181.643
CycE	-6.149	181.544
Mmp1	1.70427	180.378
GILT1	1.6977	178.904
Hsc70-4	1.17359	177.88
RPA3	-2.13759	177.672
dpa	-4.18557	176.528
RpA-70	-2.87862	175.128
CG4793	1.72931	174.298
UQCR-Q	-1.33034	174.298
Pcyt1	1.49298	173.618
sra	1.56564	173.15
CG31431	1.60099	173.119
hth	1.92421	171.355
CG5399	2.68059	170.146
Cyp4ac1	1.76712	168.548
Mcm6	-3.65013	168.041
CG43799	-4.62603	166.732
CG31075	1.56105	165.005
RpL27A	1.06832	163.568
CG13117	1.61621	159.964
Nhe3	1.46757	158.421
RpL27	1.07372	158.061
RpS26	1.07001	157.635
Ran	-1.39376	156.663
Trx-2	-1.44289	155.344
dup	-4.47614	155.293
Rm62	1.32098	154.389
CG5346	1.42554	153.813
RpS10b	1.07535	153.794
RpL34b	1.07663	152.352
fabp	1.34532	151.798
pinta	1.62701	148.416
Rac2	1.40346	145.307
ATPsynE	-1.20301	144.968
RpL7	1.0657	144.55
RpL28	1.06591	142.928
mnd	-2.10617	142.072
Irc	1.65407	141.128
RpL9	1.06735	140.588
CG1943	1.26371	137.156
CG8620	1.5392	137.022
AnxB9	1.31701	135.516
RpL36	1.07038	135.423
CG4199	1.57432	135.321
drk	1.35421	133.83
roh	-1.23559	133.216
CG14907	1.52601	132.903
PGRP-SA	1.88818	131.633
tacc	1.37023	131.264
Nplp2	1.23908	129.793
Su(dx)	1.43471	129.5
BthD	-2.86626	129.338
Fkbp39	-1.42868	126.817
lace	1.39073	126.326
CG11791	1.43581	125.754
porin	-1.20922	125.453
tsr	-1.20099	124.877
Tep4	1.37202	124.758
RpL6	1.0673	124.33
CG9752	-2.54074	123.072
Cpr50Cb	-2.53481	122.43
Rif1	-5.33547	122.388
CG10383	1.52359	121.323
GILT3	1.42695	120.786
yellow-f	1.45163	120.712
bdg	1.57164	120.588
Cyt-c-p	-1.54079	120.534
DNApol-alpha180	-4.29393	120.523
CG12112	1.35976	119.611
l(3)L1231	1.36594	119.596
CG10103	1.36241	119.346
GstE12	1.26039	118.853
RpL7A	1.06511	116.976
CG5167	1.50105	116.652
klar	1.28808	114.62
CG9629	1.34194	114.446
CG5390	1.42559	113.881
CG5004	1.42638	113.559
CG17982	1.49417	113.048
Nlp	-1.24402	112.286
RpS27	1.0616	112.192
COX8	-1.22932	111.688
spin	1.291	111.653
Reg-5	1.36943	111.575
ND-ACP	-1.29596	111.395
Ip259	1.19096	111.201
smt3	-1.26006	111.128
Chd64	-1.22679	110.27
RpS29	1.06457	110.209
RpS9	1.0753	109.946
SNRPG	-1.41887	109.888
Bacc	1.2793	108.933
Mec2	1.40305	108.255
heph	1.36883	107.953
Idgf2	1.40312	107.805
alt	-1.51536	107.49
RpL17	1.06371	107.353
mt:CoII	-1.12891	107.341
sun	-1.28451	106.858
RpL19	1.05148	106.637
LManII	1.30421	106.471
RpS14a	1.07445	105.818
capu	1.42917	105.52
LanB2	-1.76883	105.511
REPTOR-BP	1.40255	105.418
ZnT63C	1.38768	104.702
CG13690	-4.82772	104.587
shrb	1.23359	104.535
CG10376	1.40205	104.206
COX7C	-1.16142	104.075
MFS3	1.47618	103.836
CG15611	1.30533	103.482
CG7630	-1.19907	103.437
Vps28	1.25836	103.309
Mob2	1.34592	103.275
MCU	1.6246	103.207
COX6B	-1.1619	103.053
CG10512	1.2811	102.855
CG31705	1.38028	102.773
CG12054	1.30043	102.304
Dp	-2.13081	102.005
Ect3	1.57656	101.056
LanA	-1.64035	100.957
RpL4	1.06656	100.884
cdi	1.52456	100.212
CG6770	1.48877	100.178
Gapdh2	1.33452	100.109
RpS27A	1.04855	99.9466
Mcm2	-3.5734	99.6937
mt:ATPase6	-1.14996	99.4266
RpS7	1.05168	99.4194
Jheh1	1.41808	99.124
viaf	1.35751	98.6198
CG6656	1.5043	98.0106
Idgf3	1.3967	97.2649
RpS28b	1.05661	97.2225
CG6891	1.5433	96.5143
dl	1.29348	96.0349
l(2)gl	1.32088	95.7459
CG18812	1.58282	95.0457
stck	1.29113	94.9366
CG30463	-2.10193	94.8563
Myo31DF	1.33521	94.8157
RpL10Ab	1.05044	94.7467
CG13868	1.38339	94.3098
Spn42Da	1.39396	94.1492
rush	1.47386	93.8896
tx	2.12914	93.7855
dap	-2.84398	93.7019
CG32428	1.34993	93.0325
CG2310	1.31326	92.9544
Chrac-14	-2.17206	92.7459
lncRNA:CR45045	2.69244	92.7286
DNApol-alpha73	-4.52976	92.6729
RpS15	1.04595	92.4005
Vta1	1.27184	92.2863
RpL15	1.05827	92.2092
LManI	1.29221	91.6955
CG7997	1.38147	90.91
Pdi	-1.24137	90.7257
ATPsynF	-1.14703	89.869
Tre1	1.61026	89.2258
His3.3B	1.22222	88.7468
RecQ4	-3.83251	88.1628
CG4101	1.38876	88.1154
Atpalpha	1.32358	87.9977
CR43211	1.40045	87.7085
CG17760	1.28928	87.6339
Tep1	1.86122	87.5603
ps	-1.20068	87.3955
CG11686	1.29884	87.3726
Gfat2	1.2641	87.3347
Tpi	1.40726	87.2644
stv	1.65743	86.9275
eEF1alpha1	1.0482	86.431
emc	1.27451	86.4028
CG15012	1.21967	85.6607
Fili	1.62689	85.6244
Jheh2	1.27924	85.2749
CG5397	1.39269	84.9076
MICAL-like	1.28742	84.3963
tamo	1.33979	84.0077
cpa	1.20082	82.8307
mfas	1.26764	82.7598
CG13364	-1.31693	82.5617
CG2852	-1.11012	82.4289
eIF4A	1.0711	82.1411
blw	-1.16958	81.371
CG13585	1.27743	80.6454
bun	1.20787	80.3791
RpL37a	1.05344	80.3302
Pak3	1.20573	80.309
ND-MLRQ	-1.24423	80.309
CG33461	1.39751	80.2176
LanB1	-1.47241	80.1604
NT5E-2	2.50698	80.115
ics	1.20244	79.8632
Debcl	1.3529	79.6864
eEF1delta	-1.24706	79.5995
vib	1.24703	79.5236
Vps24	1.32098	79.3137
LRR	1.30654	78.8565
CNBP	-1.17264	78.8565
RpS13	1.04835	78.5674
Gs1	1.95337	78.4162
Ance-5	-1.8274	78.3407
RpS12	1.05406	78.2157
CG7029	1.36113	78.0407
Pdk	1.4032	78.0209
CG17124	1.99313	77.8145
CG33460	1.23938	77.7186
RpS15Aa	1.05204	77.5414
asRNA:CR43957	1.29072	77.223
CG17928	1.34589	77.1492
CG9821	1.1346	77.0064
RhoGEF3	1.22073	76.9323
PHGPx	1.21807	76.5419
CG42542	1.30744	76.1849
Glo1	-1.20684	76.0899
COX5B	-1.23077	75.9119
CG9171	-2.16511	75.8505
CG15347	1.60331	75.7826
His4r	1.08711	75.7609
CG12290	1.25555	75.5679
RpLP2	1.04734	75.5349
SH3PX1	1.22684	75.0002
jar	1.80016	74.9338
Vps2	1.23171	74.758
RpL24	1.05145	74.674
CG3609	1.31296	74.0601
RhoGAP71E	1.26064	73.9639
Eglp4	1.28107	73.5141
Galphai	1.20021	73.0262
CG33459	1.30982	72.8678
Nmda1	1.20618	72.6685
CDC45L	-2.55241	72.2601
CG30148	1.60481	72.2568
Ubi-p5E	1.24204	72.2088
RpL37A	1.05724	72.2088
CG11164	-3.3117	71.0731
Idgf1	1.3006	70.5421
CG8839	1.24386	70.2034
RpL12	1.04605	69.9117
CG8177	1.23763	69.9105
CG4572	1.21905	69.3167
COX4	-1.15866	69.1169
RpL13	1.04608	68.9908
DNApol-alpha50	-3.81085	68.976
AGO2	1.34636	68.9696
Gclc	1.27275	68.8955
CG42365	1.25412	68.8803
CG18659	1.21968	68.7604
RhoGAP18B	1.22205	68.3078
Neb-cGP	-1.21483	68.0498
shep	-1.29258	67.9161
CG3328	-2.15379	67.7681
l(1)G0289	1.17914	67.6216
jdp	1.56563	67.6186
Oat	1.29631	67.5776
Nxt1	-1.66826	67.1095
mthl6	1.19534	66.9765
ghi	1.20059	66.9574
cnc	1.18474	66.9098
Lis-1	1.20116	66.6786
RpL8	1.04411	66.583
CG44250	1.79144	66.5791
COX5A	-1.16458	66.3936
mt:ND5	-1.17531	66.2578
Nop60B	-1.43613	66.2139
grass	1.70477	66.0019
CG6051	1.21208	65.8705
vig2	-1.19651	65.2869
ATPsynO	-1.15212	65.1412
RpS19a	1.05578	64.9301
Snoo	1.21775	64.9161
ringer	1.81481	64.5955
Sap-r	1.19407	64.5225
RpS11	1.0397	64.3506
CG6762	1.78343	64.3132
CG5850	1.19835	64.1406
Rtnl1	-1.25838	64.1317
Nrt	1.18749	64.1218
pnr	-2.16543	63.9261
HSPC300	1.17338	63.7099
DNApol-epsilon58	-4.03947	63.6888
CG14906	1.41673	63.6663
CG12007	1.31377	63.5222
sqh	1.19491	63.376
Prosalpha5	-1.32736	62.915
Hexo2	1.21434	62.8196
SPH93	1.4239	62.6876
DnaJ-H	1.34024	62.6602
Vha13	1.11749	62.4931
RpL18	1.04615	62.442
CG5973	1.13245	62.2802
lncRNA:CR42862	1.19365	62.1175
Rab7	1.18879	62.0873
sgg	1.17455	61.9981
Eip55E	1.29671	61.8907
egh	1.14802	61.6608
CG18477	1.50953	61.5663
RpS4	1.039	61.3968
CG14903	1.27564	61.3725
CG4025	1.25748	61.0276
cathD	1.23594	60.9203
sta	1.04436	60.9077
RpL31	1.04073	60.8722
CG2201	1.4601	60.7939
CG4829	-3.90436	60.4904
hui	1.47586	60.1457
mAChR-A	1.63806	59.9035
CG14997	1.34852	59.4307
spir	1.46496	59.0433
Prip	1.3589	58.9039
Xbp1	1.17639	58.9012
be	1.30225	58.8973
Orc6	-2.75994	58.8879
RpS18	1.03717	58.687
CG43125	1.19392	58.594
Ten-m	-1.99781	58.3879
GstD3	1.35398	58.2077
sd	1.1838	58.1811
CG6707	1.15687	58.1578
HP4	-1.61582	58.0079
Hrb27C	-1.16776	58.0051
RpLP1	1.03741	57.9069
MED10	1.13581	57.8597
7SLRNA:CR32864	-2.09881	57.7629
Ugt35a	1.3506	57.4904
Rab14	1.18798	57.2615
RpS20	1.04263	57.0735
CG32103	1.17862	56.9626
mxt	1.30499	56.9232
CG14629	-1.30045	56.5825
Msp300	-1.21023	56.2386
Slbp	-2.09682	56.2051
Marc	1.26448	56.0725
rho-4	1.2111	56.0469
CAP	1.3417	56.0031
CG42846	1.3612	55.9895
Eip75B	1.16269	55.5845
flr	1.12288	55.1811
CG3625	1.43277	55.1807
oys	1.26623	55.1702
CG12004	1.15014	54.7813
Xrp1	1.15122	54.7049
Ac78C	1.47472	54.6746
ATP6AP2	1.17318	54.6077
RpL21	1.03623	54.3759
Glut4EF	1.24243	54.3133
Tig	-1.48443	54.1398
GstO3	1.19887	53.9845
Alg2	1.24138	53.6967
p38a	1.27047	53.5219
p23	-1.13877	53.4557
RpS24	1.04574	53.1145
betaTub56D	-1.19673	53.0505
Atg8a	1.18857	52.9415
CG10077	1.13938	52.8658
CG10527	1.34909	52.5885
CG32276	-1.16292	52.4499
CG5953	1.16285	52.4357
CG34125	1.14832	52.2212
CG11790	1.14238	52.221
CG5254	1.18325	52.2151
Rcc1	-1.86394	52.1513
Gnf1	-2.17235	52.1276
corn	-1.78987	52.1106
RpL35	1.04072	51.7522
Cyp4e2	1.18966	51.7431
Snap24	1.28073	51.6456
Ctf4	-3.29884	51.5337
step	1.22133	51.1604
RpL14	1.03541	51.0908
Rsf1	1.1128	51.075
CG30283	1.22618	51.0595
RpS8	1.03431	50.8393
nrv2	1.29084	50.8337
CG33462	1.51418	50.6798
prage	1.17466	50.4797
Oda	1.1031	50.2319
CG3430	-2.67944	50.1655
Wbp2	1.13881	50.1205
Gie	1.12927	49.9279
Samuel	1.29653	49.6447
timeout	-2.63778	49.49
RpL32	1.03794	49.4574
GstE6	1.1531	49.4299
CrebB	1.11763	49.3106
CG34288	1.21238	49.2595
ATPsynC	-1.0823	49.1284
RpS23	1.03464	49.1039
Phf7	-3.29096	49.0152
CG42807	1.37265	48.979
CG32039	1.12518	48.9484
pst	1.22583	48.828
CG42711	1.15459	48.7911
CG11236	2.08643	48.7553
Ubc6	1.11909	48.6843
drongo	1.19354	48.4775
Drs	1.99931	48.3212
CG8300	1.20096	48.3116
RpS21	1.04157	48.3002
lectin-24A	1.68134	48.2149
Cerk	1.29864	48.2076
Alh	1.13384	48.1525
Zasp52	1.53425	47.8768
kst	-1.76157	47.8469
RpL18A	1.03256	47.6966
msi	1.12739	47.6526
CG14292	2.61773	47.5842
Ets21C	1.18564	47.4585
tara	1.13474	47.4351
CG33465	1.18861	47.2406
CG5446	1.10301	47.174
CG2765	1.16787	47.1201
CG6569	1.76011	47.1121
CG11753	1.148	47.0108
Nhe2	1.2158	46.9514
MFS17	1.14591	46.7726
2021-09-02	1.12713	46.6364
CG13482	1.60205	46.4869
FASN1	1.1724	46.4052
mys	1.10151	46.3755
RabX1	1.21271	46.3735
ALiX	1.13105	46.2255
DNApol-alpha60	-3.2751	45.9061
CG33054	1.14152	45.8968
Map205	1.10066	45.8216
vkg	-1.35722	45.5981
ATPsynD	-1.12761	45.5397
sgl	-1.65945	45.4906
VhaAC39-1	1.11321	45.4334
fend	1.30789	45.3903
Eip63E	1.10924	45.3367
vir-1	1.1823	45.2956
Rhp	1.299	45.2574
CG13887	1.07596	45.1966
Aldh-III	1.1401	45.1266
CG8745	-1.73748	45.1224
CG7470	1.84123	44.9727
Ubi-p63E	1.1003	44.9643
sty	-1.53507	44.9346
lqf	1.13557	44.6942
CG7860	1.46435	44.6145
RpS3	1.03532	44.5899
CG1896	1.09286	44.5715
CG15083	-2.17715	44.5284
Calr	1.15577	44.1488
RpS30	1.03876	44.1208
14-3-3epsilon	-1.13194	43.8663
eEF5	1.03725	43.7963
Tina-1	1.23499	43.7652
CG2794	1.18599	43.6849
Rab4	1.11173	43.6704
gish	1.09243	43.6542
Cyp6a17	1.24588	43.5777
RhoGAP92B	1.12992	43.4881
Pmp70	1.13438	43.4644
CG8312	1.16519	43.4042
Col4a1	-1.33038	43.3531
Rab1	1.09769	43.3031
Cdk5	1.22953	43.1992
ATPsynB	-1.11815	43.1867
Pino	1.20941	43.0205
opm	1.16958	42.9828
Prestin	1.24578	42.8804
CG5028	1.11993	42.8702
Rbsn-5	1.205	42.6881
CG31780	1.42006	42.6263
wb	2.02118	42.5974
CG8046	1.47035	42.2868
CG14818	1.12013	42.2745
Caf1-55	-1.68582	42.1925
rdx	1.14651	42.1349
Arpc3A	1.11646	42.1061
CG4594	1.27235	42.0326
stj	1.20881	41.8024
Vinc	1.14115	41.7599
vari	1.51985	41.735
Thd1	1.07652	41.6297
wnd	1.25023	41.609
CG9932	1.23748	41.5885
CG42663	1.28467	41.5251
Vrp1	1.1315	41.5113
pbl	1.20614	41.4052
COX7A	-1.11354	41.2348
His1:CG33816	1.70911	41.1611
Got2	-1.55943	41.0604
CG7879	1.19919	41.0418
Rab6	1.11001	40.9679
Vap33	-1.37458	40.9612
CG4678	2.01508	40.9507
CG5721	1.16723	40.7639
Atf3	1.11629	40.6797
RpL26	1.0314	40.5656
cype	-1.11281	40.5393
p130CAS	1.6787	40.3775
Ntf-2	-1.25359	40.3066
Skp2	-2.32235	40.1885
DNApol-epsilon255	-2.76094	40.1592
CG1998	1.47882	40.0684
Shc	1.09955	39.993
RpL13A	1.029	39.9307
CG45050	1.09813	39.8319
RpL39	1.03838	39.8204
pes	1.09914	39.6532
CG7322	1.24057	39.6297
Dap160	1.15106	39.6171
ERp60	-1.16158	39.5909
CG11448	1.18339	39.4757
VhaM9.7-b	1.09704	39.4453
Cdk2	-2.50492	39.4087
Det	1.07159	39.3902
ome	1.18704	39.1871
CG30423	1.10382	39.0994
Smg5	1.16391	38.917
kibra	1.15197	38.9134
lncRNA:CR43651	1.28099	38.868
galectin	1.23695	38.7993
Sc2	1.07285	38.7036
Vps4	1.12148	38.6753
I-2	1.14012	38.5861
Gclm	1.16892	38.5726
CG11882	1.37723	38.4374
Pgd	1.13307	38.3813
Pde8	1.17728	38.2208
CG11537	1.1535	38.0535
sds22	1.04213	37.8523
CG33229	1.14003	37.7584
HmgZ	1.13024	37.7316
sigmar	1.14032	37.618
CG3505	1.18323	37.5825
mt:ND3	-1.18917	37.4401
cpb	1.08808	37.4084
Vha26	1.06915	37.3869
chrb	-2.07809	37.3434
Ptp61F	1.12767	37.3148
CG30159	1.07756	37.2957
blot	1.62247	37.275
CG8209	1.06292	37.2487
CG15536	1.26891	37.1922
RpL29	1.03738	37.1294
ifc	1.11605	37.1191
Syx1A	1.09816	37.1191
CG33494	1.12247	36.8805
Rab8	1.04476	36.7926
mod	-1.32206	36.665
Usf	1.14563	36.5475
CG12163	1.117	36.528
alpha-Est1	1.27156	36.494
cnn	-2.16096	36.4629
DAAM	1.19371	36.2531
Mcm10	-3.07894	36.1269
pins	1.15447	36.0377
lncRNA:CR34335	-1.12255	35.9854
ATPsynCF6	-1.11956	35.9846
eEF1beta	1.03861	35.9241
et	1.08456	35.9004
alphaTub84B	-1.13404	35.8771
Pomp	-1.275	35.7899
drpr	1.1026	35.7722
lwr	-1.41837	35.7277
olf186-F	1.13461	35.6768
Swip-1	1.25853	35.6457
PGRP-LA	1.36858	35.5818
mib2	1.13114	35.4456
Mvl	1.1257	35.4076
uex	1.05597	35.3376
sip2	1.35674	35.2848
CG11267	-1.16211	35.212
scyl	-1.70095	35.1769
Pgk	1.06976	35.1298
crq	1.19071	34.9333
Pp2C1	1.29158	34.8845
CG13014	1.12834	34.8729
CG9953	1.1325	34.8565
CG4036	1.20231	34.8278
CG2211	1.20816	34.8136
CG34150	1.15592	34.7675
spri	1.18586	34.677
Gli	1.50331	34.6035
mt:ND4	-1.13063	34.5462
TBCB	1.10793	34.5141
Vha68-2	1.11459	34.368
Ibf2	-1.80085	34.3368
Arp3	1.08069	34.3008
RpS14b	1.07056	34.2706
Pabp2	-1.00124	34.2227
CG10098	1.24671	34.0826
Tspo	1.1146	34.0826
Gos28	1.12506	34.0372
Su(Tpl)	1.05922	34.0365
RpS16	1.03285	33.982
CG1572	1.14317	33.9454
jvl	1.08227	33.8936
RfC4	-1.77093	33.8735
Csp	1.12121	33.8306
RpL23A	1.03291	33.8007
ben	1.09065	33.795
TMS1	1.13655	33.7863
Vha55	1.06601	33.7774
CG9328	-1.57961	33.7394
dpr3	1.20224	33.716
CG15547	1.25216	33.6598
Best1	1.12939	33.6273
Fpps	1.21478	33.6033
CG2182	1.06426	33.583
Rbf	-1.83738	33.5699
me31B	1.07375	33.5543
Diap2	1.17335	33.5227
LTV1	1.04097	33.3883
Rrp1	-1.84106	33.3291
Fkbp14	-1.2422	33.2394
pix	1.07602	33.1937
7SLRNA:CR42652	-1.96017	33.1513
CG15820	1.41459	33.1297
Lk6	1.12141	33.0963
REG	-1.22842	33.0249
Socs44A	1.20159	32.9254
Non1	1.10271	32.7904
CG34126	1.11128	32.6652
pod1	1.07965	32.6652
Frl	1.14752	32.6208
VhaPPA1-1	1.05098	32.6133
ste24a	1.05448	32.5567
Klp67A	1.78253	32.5451
Pdp1	1.08486	32.5204
fwd	1.071	32.4907
imd	1.10235	32.4431
CG31324	-1.79351	32.1228
lncRNA:CR44133	1.16305	32.1165
CG40160	1.39888	32.0637
Vps20	1.07696	32.0315
CG33226	1.24686	32.026
DhpD	1.26252	31.9698
Cyp9f2	1.20222	31.9191
RhoL	1.16085	31.9024
pirk	-1.0037	31.8575
DNApol-delta	-2.57414	31.8287
lama	1.10024	31.8211
Sec61beta	-1.13956	31.7882
Usp12-46	1.35152	31.7853
Arpc2	1.06952	31.7235
Diap1	1.08839	31.572
RapGAP1	1.28341	31.5289
CG12012	1.10043	31.4542
CG43736	1.0581	31.3929
CG3198	1.07062	31.3407
VhaSFD	1.05736	31.2341
CG31098	1.1587	31.2187
Hsp83	1.12364	31.1788
bic	-1.06052	31.1469
Psf1	-2.03599	31.1372
CG7149	-2.47288	31.1165
mRpL4	1.05453	31.0695
Zip99C	1.56584	31.0572
hrg	1.10349	30.9763
CG6984	1.08779	30.9445
ND-51	1.05816	30.935
cert	1.07874	30.8752
Spn27A	1.11445	30.8613
Dhpr	1.17714	30.8464
Atg18b	1.31084	30.7144
CR43212	1.30528	30.6981
NKAIN	1.07229	30.6981
CG1827	1.07044	30.6837
CG18747	1.08262	30.6637
Hsp70Bc	-2.40767	30.6616
ITP	-2.03959	30.623
mRpS14	-1.65508	30.5211
CG31710	-1.9428	30.508
asf1	-1.49343	30.5008
Scamp	1.07547	30.4292
Vps60	1.04565	30.4023
crc	1.04542	30.3745
HmgD	-1.08722	30.1347
Nop56	-1.35753	30.0226
cib	1.10156	30.0009
lncRNA:CR43626	-2.41718	29.8408
Sid	1.33551	29.8193
Orc1	-2.81859	29.8163
fray	1.13702	29.7984
ND-B14.5B	-1.32461	29.7422
Fim	1.12833	29.7066
IP3K1	1.10585	29.5682
CR6900	1.40329	29.4986
Mapmodulin	-1.36677	29.4539
CG42684	1.19326	29.4296
CG4631	1.23648	29.3649
CG17508	1.08051	29.3474
CG2862	-1.17346	29.3439
Rab35	1.03068	29.3244
rdgB	1.44824	29.2917
CG5059	1.16317	29.2343
Nurf-38	-1.18505	29.2008
SmE	-1.30687	29.1355
Tfb1	1.07421	29.1052
r-l	1.09614	29.0298
CG15653	1.25258	29.0242
Hsp70Ba	-3.94327	29.0021
mlt	1.68666	28.9939
Rab2	1.09333	28.9631
Act42A	-1.1465	28.957
CG30187	1.09488	28.9214
Vps37B	1.09634	28.9192
Clc	-1.30383	28.9007
Lapsyn	1.3972	28.8248
DNAlig1	-2.32233	28.6389
l(2)dtl	-2.42651	28.613
Hph	1.36015	28.5921
GstE9	1.38131	28.5725
CG1648	1.42296	28.5142
CG11141	1.12917	28.4611
CG11788	-2.11038	28.45
Pmm2	1.07258	28.4464
CG41378	1.11992	28.3378
CG10195	1.25858	28.2999
lncRNA:CR46064	1.07639	28.2794
luna	1.10953	28.2595
Vha16-1	1.05994	28.1272
mRpL10	1.12831	28.1078
CG17734	-1.50322	28.0839
CG1882	1.17036	27.8521
alphaSnap	1.02766	27.8513
CG10413	1.083	27.827
scu	-1.21439	27.8207
GstD9	1.1157	27.8087
RpS17	1.0315	27.8082
nudE	1.11726	27.7816
Ars2	1.01086	27.7708
geminin	-1.57241	27.6907
Zfrp8	1.11963	27.6487
AttB	2.00715	27.6444
Chc	1.0374	27.6099
Stat92E	-1.37794	27.5219
RpL34a	-1.06514	27.4409
MED22	1.00053	27.3744
CG14434	-1.62298	27.2316
Flo1	-1.00018	27.2188
kraken	1.05949	27.1636
Cap-G	1.35962	27.157
CG30046	1.09464	27.1331
Gmap	1.088	27.1207
Roc1a	-1.19687	27.1048
CG7668	1.02912	27.0752
Vha44	1.05025	27.0338
CG15771	1.15531	26.9884
eater	1.12152	26.9734
mbl	1.05048	26.9024
CG6845	1.52326	26.8942
CG8668	-1.64905	26.8616
Cam	-1.10411	26.8337
UQCR-11	-1.17247	26.8126
Egfr	1.40003	26.7791
CG8289	1.16592	26.7063
CG5757	-1.71248	26.6462
Syx13	1.04439	26.6383
CG32425	1.07154	26.6381
Smn	1.05331	26.5769
bip2	1.00558	26.5738
Stt3B	1.05339	26.5173
CG3902	1.10468	26.5166
CG40178	1.10856	26.5095
Acf	-2.00511	26.5078
Rrp4	1.01811	26.4993
RNASEK	-1.12766	26.4706
Hml	-1.29626	26.3625
svr	1.01896	26.3454
ScsbetaG	1.03695	26.3166
Adk2	1.02957	26.2394
Rab11	1.05904	26.2116
Sfxn1-3	1.00859	26.1352
CG34424	1.04921	26.1305
Haspin	1.1296	26.1245
ci	1.33153	26.1163
betaggt-I	1.11396	26.1083
CG12204	1.17624	26.0627
Psc	1.03171	26.0515
CG34054	-1.9319	25.9993
Tollo	1.19747	25.9708
CG3077	1.25406	25.9652
Exd2	1.17252	25.9126
Dbi	1.10399	25.8942
asrij	-1.00593	25.8746
corto	1.11603	25.8603
Ack-like	1.06212	25.8524
Rpn11	1.01451	25.8338
CG34376	1.29423	25.8306
mei-38	-2.31793	25.781
xit	1.06093	25.7672
Papst2	-1.9384	25.765
CG2641	-1.81594	25.7157
Orc2	-2.6716	25.6355
SppL	1.07513	25.615
Fkbp59	-1.29785	25.6016
CR43214	1.33439	25.5944
rogdi	1.0833	25.539
GstT1	1.02893	25.4969
ND-AGGG	-1.1628	25.4594
fat-spondin	-2.08931	25.4583
mgr	1.03467	25.4535
elg1	-2.24152	25.4535
UK114	-1.9122	25.4484
Bap60	1.03595	25.4358
Tsf3	1.32292	25.4136
CG4301	-2.22361	25.334
cu	1.08183	25.3297
mst	1.1071	25.312
Dbp80	1.00846	25.3119
Stam	1.03822	25.2081
Eip74EF	1.13064	25.1953
Atg3	1.05093	25.1378
CG12018	-2.00442	25.1269
CG32521	1.1063	25.1202
Strica	1.15148	25.1173
GXIVsPLA2	1.1813	25.0576
CG6287	1.49862	25.0532
CG31815	1.20272	25.0289
Hrs	1.12738	25.0171
CG6356	1.43686	25.0138
CG14567	1.74368	25.0049
par-6	1.06381	24.934
TBCC	1.10221	24.9024
Graf	1.01759	24.8902
CG15211	-1.42195	24.8693
MED31	1.11805	24.852
CG42259	1.32064	24.8332
EndoGI	1.01889	24.8231
PIG-V	1.11242	24.7716
wdp	-1.87887	24.7687
Ser	-1.8205	24.7221
spz	-1.25504	24.7043
mRpS11	1.06888	24.6659
His1:CG31617	1.80567	24.6531
CG6983	1.20053	24.6355
mRpS34	-1.0006	24.6083
bor	-1.77957	24.5561
CG17841	1.1209	24.5432
trio	1.12833	24.5377
mt:CoIII	-1.06315	24.5253
CG14715	-1.14202	24.5087
CaMKI	1.06899	24.4928
Trs20	1.07017	24.4564
CG6693	-1.75003	24.4561
CG43340	1.04389	24.349
jtb	1.08081	24.3286
pdgy	1.14173	24.2314
Btk29A	1.10257	24.2218
CG32202	1.14345	24.1684
A16	1.10083	24.1158
mmy	1.03123	24.1082
26-29-p	1.09276	23.9801
CG6329	-2.37213	23.9399
QIL1	-1.00812	23.9046
CG7536	1.10138	23.8334
Sodh-2	1.14819	23.7887
Cyt-b5	-1.40583	23.7871
CG8993	1.01651	23.7223
E(Pc)	1.03135	23.6434
vap	1.15488	23.6145
CG14322	1.30401	23.5621
ATPsyndelta	-1.14385	23.5549
CG5734	1.09783	23.5226
Fnta	1.01892	23.515
Vha100-1	1.09778	23.4962
mRpS22	1.01899	23.4581
lncRNA:CR44151	1.52906	23.3606
hoip	-1.31042	23.3335
CG7168	1.16545	23.2671
CG14036	-3.0183	23.2131
Sod1	-1.14428	23.1889
CG15210	1.78079	23.1547
mth	1.20187	23.052
Dlic	1.03013	23.0182
Dp1	-1.35138	22.9916
da	1.01639	22.9148
Rab5	1.03819	22.9119
lncRNA:CR45321	-2.87573	22.9114
mars	1.25255	22.8625
CG5335	1.04782	22.8363
Trs31	1.03699	22.8274
Mkp3	-1.88385	22.8256
RN-tre	1.02806	22.8227
aPKC	1.09775	22.7539
O-fut1	-1.51268	22.6932
Act5C	1.06972	22.6785
Jupiter	-1.25943	22.6562
AGO1	1.01862	22.6431
GstE11	1.17418	22.6009
Dpit47	1.00681	22.5678
CG2811	1.07001	22.5575
Tomosyn	1.13173	22.5265
gw	1.0056	22.4558
cutlet	-2.20997	22.4558
RpS25	1.02315	22.3817
Drice	1.09632	22.3719
Gprk2	1.0618	22.367
CG10809	1.14777	22.3424
Ciao1	1.0239	22.2796
Arpc4	1.06393	22.2285
NimB2	1.01731	22.2219
Atg4a	1.17711	22.2021
CG9701	1.59347	22.1583
CG1146	1.11997	22.1518
Wsck	1.51121	22.133
CG17029	1.05704	22.1197
SmD2	-1.23852	22.1183
CSN5	-1.01431	22.0589
myo	1.01224	22.0174
Cdk1	-1.62103	22.0145
CG5773	1.62253	21.9952
CG30109	1.09769	21.9778
CG13124	1.10454	21.9203
NitFhit	1.23565	21.9055
CG4598	-1.01766	21.8947
Taf4	1.06844	21.8671
CG6700	1.07676	21.8657
sug	-2.07467	21.8029
RASSF8	1.05691	21.775
hebe	1.38445	21.7657
Rcd5	1.10091	21.7388
Mlc-c	1.05544	21.6894
AdenoK	-1.61061	21.6732
Taf10	-1.02408	21.6664
Caf1-105	-2.09678	21.6598
CG31337	1.15561	21.6293
Cwc25	-1.00763	21.6221
CG10131	1.13513	21.6141
olf186-M	1.05999	21.5921
Prosalpha3	-1.21962	21.5898
Atg17	1.04816	21.5824
CG8207	1.07791	21.5542
RpL23	1.02044	21.5183
Dek	-1.52113	21.5007
CG15891	1.02715	21.4764
eEF1gamma	1.03821	21.4659
CG12822	1.09365	21.4382
Prosbeta6	-1.22113	21.4133
Vha100-2	1.02892	21.3776
trbl	-1.91783	21.3753
Chro	1.05439	21.3404
mip120	1.3114	21.2738
mRpL45	1.01202	21.2613
Atg18a	1.04274	21.2604
Galphas	1.02271	21.2151
Tsp42Ee	-1.95364	21.2031
Ssl1	1.07772	21.1455
ScpX	1.05277	21.1341
betaggt-II	1.04326	21.0872
Bet5	1.04386	21.0448
mbc	1.00278	21.0088
CG5919	1.09297	20.9926
Hex-A	-1.67877	20.9838
D2hgdh	1.23193	20.9816
Cep135	1.3479	20.9804
CG12567	1.08718	20.975
aph-1	1.04767	20.9629
Hr78	1.16583	20.9367
l(3)02640	-1.90157	20.9009
CG42566	-1.35678	20.8771
RpL41	1.02548	20.8639
RpL35A	1.02343	20.8305
Gtp-bp	1.0322	20.8247
Fgop2	1.14628	20.8235
Sf3b6	-1.00241	20.815
deltaCOP	-1.02322	20.815
Zwilch	1.32892	20.776
hook	1.06496	20.7405
CG8818	1.04722	20.7191
CG2003	1.06724	20.7075
loco	-1.0148	20.6752
Su(P)	1.0639	20.6431
CIAPIN1	1.0368	20.6232
GstE3	1.28112	20.6058
Sk1	1.33422	20.6033
mt:ND2	-1.16953	20.5367
l(2)05714	1.32686	20.496
CG5969	1.02398	20.4649
CG4210	1.43806	20.4295
CG2818	1.01759	20.3981
jim	1.01987	20.3743
CG7900	1.09653	20.3738
CG33129	-1.37541	20.3633
udd	1.01414	20.3488
CD98hc	1.00942	20.3348
Arl2	1.06237	20.3263
NimC1	-2.86544	20.2957
ATP8B	1.06968	20.2007
CG31548	1.04136	20.1175
maf-S	1.00086	20.1025
Spn88Ea	1.10793	20.0974
Orc5	-2.07902	20.0655
Ublcp1	1.06341	20.0541
Rheb	-1.00927	20.01
Cortactin	1.02284	20.01
CG7407	1.10071	20.0039
Rala	1.00863	20.001
Paip2	1.04396	19.9381
CG34449	1.04725	19.9188
CG2277	-1.67606	19.8946
PNUTS	1.00945	19.8819
Mo25	1.02305	19.871
eIF3h	1.0511	19.8491
Hip1	1.07049	19.8101
CG42674	1.0419	19.726
CG31523	1.08322	19.7254
Ost48	-1.18993	19.7254
Pi3K92E	1.00809	19.7193
CG12116	1.59469	19.7096
CG3558	1.00643	19.7096
slmo	1.17665	19.7064
CG30094	1.07804	19.6972
CG32549	-1.61411	19.6921
CG5704	1.1924	19.5917
squ	1.55655	19.5675
CG2116	1.16172	19.567
CG7414	1.02922	19.5491
Ilp6	1.08167	19.5443
EndoA	1.02841	19.4941
dgt2	1.01319	19.4927
eIF3a	1.00881	19.4691
sut1	1.12876	19.4145
mt:ND1	-1.28886	19.3716
CSN7	-1.01521	19.3539
CG33506	1.05088	19.3375
FeCH	1.15378	19.3142
Sam-S	-1.46589	19.3088
C1GalTA	-1.59658	19.2952
coro	1.02511	19.278
ptc	-2.1112	19.2583
Nse1	1.21809	19.2504
pyr	1.14176	19.2221
l(1)G0193	1.01286	19.195
ens	1.0232	19.1863
dpr17	1.18514	19.1307
fz4	1.20325	19.1226
ND-13B	-1.27177	19.1154
RpS3A	1.02598	19.0542
nrv1	-1.02687	19.0542
CG15514	1.06258	19.0341
lectin-24Db	1.24419	19.0208
CG7324	1.11639	19.0141
CG4250	-1.179	18.9518
ppl	1.01302	18.9461
NAT1	1.01082	18.9353
CG10863	1.07843	18.9347
Klc	1.07597	18.8987
CG13601	1.00777	18.8974
CG31174	1.60484	18.8952
ArfGAP3	1.03868	18.8867
CG9705	1.02655	18.868
HDAC4	1.0114	18.8671
scf	-1.19163	18.857
angel	1.06939	18.853
cold	1.19159	18.8328
msn	1.01141	18.785
Lar	1.11419	18.782
nej	-1.01687	18.7602
Vha14-1	1.06414	18.7217
CG31370	1.25338	18.7206
CG14985	1.13567	18.6845
CG13605	1.1087	18.6806
Ank	-1.01295	18.6688
ctp	1.04383	18.6264
usp	1.05697	18.6263
AP-1sigma	-1.00491	18.5962
CG42671	1.04832	18.58
Gip	1.04959	18.5623
CG31219	-2.53774	18.5515
prel	1.0636	18.5489
JTBR	1.07206	18.5416
hoe1	1.18023	18.4462
HP1D3csd	1.08313	18.4301
SdhB	-1.06983	18.3752
Pex12	1.214	18.3547
CG30344	-1.01555	18.3472
ken	-1.91297	18.3378
CG31800	1.0492	18.3271
CG11122	1.0796	18.3168
CG13896	1.28603	18.2938
esc	-2.13996	18.2893
CG8132	1.00856	18.2872
lncRNA:CR44331	1.36469	18.2199
CG6607	-1.00623	18.1885
Pax	1.04881	18.1876
su(w[a])	1.09139	18.1232
dos	1.05312	18.1219
bowl	1.50873	18.1059
CycA	-1.70072	18.0914
CG1890	1.03046	18.0754
Mpc1	1.06072	18.0729
Syb	1.04495	18.0713
Cat	1.03287	18.0143
hid	1.51733	18.0138
lncRNA:CR43459	1.12957	18.008
Orct2	-1.91533	18.0033
CG5727	1.17829	17.9782
InR	1.07598	17.9683
CG13623	1.09234	17.9497
Dronc	1.02771	17.9256
CG14411	1.04909	17.9223
Sras	1.10645	17.9067
CanA-14F	1.0399	17.8941
Rop	1.00209	17.8537
MSBP	-1.03265	17.8537
CG8372	-1.00207	17.8265
CG14291	1.13713	17.792
CG3348	1.65876	17.772
sti	-1.94329	17.7718
Rap2l	1.00185	17.7626
Gprk1	-1.03018	17.7614
CG8478	1.42237	17.754
CG11593	1.08095	17.7352
pen-2	1.05173	17.7057
Syp	1.08687	17.6977
pnt	-1.46763	17.6957
CG6959	1.44657	17.6796
CG15602	1.14161	17.6576
l(2)41Ab	1.32834	17.6508
upd3	1.0411	17.601
mop	1.00026	17.5916
CG17855	1.02308	17.5795
prtp	-1.44427	17.5732
CG8539	1.49994	17.5145
CG14969	1.02292	17.4684
XNP	-1.6773	17.4437
lncRNA:CR32218	1.12409	17.4383
Cont	1.07775	17.4276
Rab18	1.01329	17.3758
CG1161	1.0156	17.3595
Baldspot	1.03074	17.3526
PGRP-LC	1.00082	17.3395
Pli	1.06554	17.3307
CG12811	1.02075	17.3259
Prpk	-1.01118	17.2848
sub	-2.00812	17.2829
RpL36A	1.01915	17.2651
CG8237	-1.00975	17.2329
CG4968	-1.0307	17.2327
lilli	1.03214	17.1936
CG3894	1.08974	17.1849
B52	1.0679	17.1722
mRpS28	-1.00962	17.1518
RhoGDI	1.05041	17.143
Pkc53E	1.3651	17.1428
Reg-2	1.86492	17.1246
RpL24-like	1.03486	17.1212
pxb	-1.69844	17.0859
CG8073	-1.0088	17.0716
Mob4	1.00867	17.0617
Ance	1.22404	17.0522
Taf12	1.03148	17.0227
SdhD	-1.05074	17.0122
simj	1.00599	16.9742
Hmg-2	1.21642	16.9398
CG34001	1.09684	16.9282
lncRNA:CR32385	1.16189	16.9002
CG43394	1.35216	16.8753
CG8108	-1.48673	16.8533
Ythdc1	1.06583	16.8287
asRNA:CR45140	1.44267	16.8283
CG9186	1.08663	16.7897
Sclp	1.03183	16.7862
Tom7	-1.14501	16.7622
CG32196	1.3122	16.7395
CG30286	1.43242	16.7251
pck	1.06237	16.7204
CG2046	-1.0619	16.704
CG13116	1.28811	16.6989
Past1	1.00342	16.6825
Ssrp	-1.53515	16.6551
Itgbn	1.26357	16.6085
M1BP	-1.00838	16.6054
Srp19	-1.03471	16.5986
Abl	1.02617	16.5974
Den1	1.08388	16.5966
Pngl	1.05115	16.5954
GstE7	1.11475	16.5889
Ras85D	-1.00776	16.5769
Ho	1.05633	16.5707
mus101	-2.14774	16.5562
RNaseMRP:RNA	-1.69492	16.5428
CG1105	1.11479	16.5345
CG5532	1.05975	16.5203
CG5909	1.66664	16.4902
Pur-alpha	1.00545	16.4484
CG32022	1.0255	16.4462
GEFmeso	1.22266	16.4432
CG14688	1.00555	16.3887
Myo61F	1.01423	16.3858
Xe7	1.01261	16.3576
Arfip	1.00445	16.3513
CG7461	-1.03415	16.3456
CG9922	-1.27121	16.3407
spn-A	1.0936	16.3367
Arf102F	-1.22999	16.3317
CG4789	1.01212	16.3231
mri	1.03523	16.2936
CG9911	1.02504	16.2702
ena	-1.58985	16.2338
dgt3	1.4071	16.2246
NimB4	1.12683	16.1993
CG18731	1.00712	16.1955
Glt	-1.34602	16.1616
eIF2alpha	-1.1619	16.1286
MED8	1.02102	16.083
GstD2	1.5279	16.0764
CG7694	1.23123	16.0054
hd	-2.18159	16.0045
KrT95D	1.02911	15.9871
qm	1.01785	15.9731
Syx8	1.07069	15.966
ced-6	-1.69707	15.9229
CG3652	-1.00727	15.9213
CG6665	1.15704	15.9109
Ubc10	1.02463	15.8639
CG14117	1.29051	15.8589
Mdh1	-1.26513	15.8347
Ipk2	1.01107	15.7981
eco	-1.73228	15.7729
Mtp	-1.631	15.7651
phol	1.03277	15.7068
mRpS10	-1.54637	15.7066
CG4729	-1.00465	15.6981
Gale	-1.25576	15.6914
eEF2	-1.04482	15.6904
Gpdh1	1.0034	15.6687
Dcr-2	1.06106	15.6681
CG31937	-1.01296	15.6463
C3G	-1.0034	15.6091
hdly	1.003	15.6082
Gss1	-1.02569	15.6082
Usp32	1.18256	15.6036
Arl1	-1.02054	15.5863
san	-1.48279	15.5632
Prx2540-1	1.31991	15.56
CG11454	-1.01824	15.5533
Vha36-1	1.01182	15.5247
CG7806	1.04185	15.5124
Fadd	1.09409	15.5092
CG31717	-1.01335	15.4925
Arv1	1.14231	15.4818
mRpL38	-1.00618	15.4753
Tango14	-1.0182	15.4476
Rip11	1.00362	15.4304
Acyp2	-1.00715	15.4291
Mtch	-1.0439	15.4074
Rtca	1.22911	15.4001
CG1544	1.07254	15.3952
TSG101	1.03566	15.3845
sav	1.22268	15.3692
Herp	1.01795	15.3522
CG15111	1.02378	15.3427
CG10399	1.08249	15.3235
CG12404	-1.02638	15.2887
CG31702	1.30781	15.2823
CG3500	1.02771	15.2801
CG7789	-1.01895	15.2797
CG14767	-1.00193	15.2587
CG42232	-1.05593	15.2559
CG43886	-2.10091	15.2448
RhoGEF4	1.36015	15.2254
unk	1.04075	15.225
Desat1	-1.00588	15.214
CG15237	1.01129	15.1858
Gp93	-1.26712	15.1761
E2f2	1.03315	15.1403
Scox	-1.03926	15.1314
mRpS5	-1.0302	15.1038
Acn	-1.04614	15.0785
CG31999	1.33405	15.0403
CG5527	-1.85809	15.0311
blow	1.20326	15.0189
fbl	1.09228	15.0159
Catsup	-1.04968	15.0148
Arl6IP1	-1.01575	14.9654
GMF	-1.03532	14.9649
CG7945	-1.00087	14.9634
wge	-1.00739	14.9317
CG2865	1.00121	14.8874
Dip-C	1.02613	14.874
Trf2	-1.39722	14.8719
Phm	-1.02583	14.8577
Chd3	-2.01732	14.8123
GstE13	-1.00336	14.8117
sinu	1.30894	14.7754
wun	1.15066	14.7494
CG9154	1.05918	14.7196
CSN4	-1.06522	14.7196
CG42389	1.03513	14.7162
scramb1	-1.00181	14.7136
CG4259	1.0212	14.7084
psq	-1.01362	14.7063
p38c	1.34789	14.7053
Mccc2	1.06293	14.6998
chn	1.06362	14.6857
Klp98A	1.0473	14.6801
CG33458	1.39834	14.677
mRpS26	-1.04837	14.6611
Archease	-1.06637	14.6598
CG8481	1.06034	14.6486
CG5151	-1.41441	14.6173
bsk	1.00682	14.6033
CG7194	-2.07976	14.5913
SREBP	-1.0164	14.5655
CG7488	1.08542	14.5631
rudhira	1.00687	14.5538
RpL40	1.01901	14.546
SmD3	-1.01148	14.4656
Mitf	-1.01153	14.4568
Aldh	1.05657	14.4417
Sirt1	1.09344	14.426
GstE8	1.17968	14.4106
Caper	-1.00541	14.4101
coil	1.1757	14.3816
EcR	-1.00608	14.3777
nesd	1.14601	14.3734
JMJD4	1.02293	14.347
CG5290	1.14626	14.3364
CG7379	1.16088	14.3063
PTPMT1	1.03672	14.2623
CG15706	1.05757	14.2487
Fas1	-2.49693	14.246
CG10425	-1.01879	14.2294
ago	1.0461	14.2109
Meics	1.24671	14.2092
eIF4G1	-1.22512	14.1495
CecB	1.43607	14.1489
Rpp30	1.07246	14.1344
Drat	1.07899	14.1262
alphaTub85E	-2.12791	14.1202
CG9360	1.48592	14.095
Spf45	1.0115	14.0934
eRF3	-1.35755	14.0406
sni	1.00173	14.0251
CG1646	-1.01716	13.9885
CG4390	-1.29487	13.9729
CG31712	1.05474	13.9659
CG31076	1.35275	13.9563
Cf2	1.05516	13.9535
Parp	1.01616	13.9502
CG3770	-1.77405	13.9377
lncRNA:CR45635	1.52876	13.9318
cid	-2.14468	13.9285
CG6695	1.05014	13.8893
Pcd	1.04483	13.8875
L2HGDH	-1.03043	13.8848
His1:CG33834	1.54817	13.8659
Tbce	1.07544	13.8382
gb	-1.53605	13.8364
CG6878	-1.03181	13.8332
CG12773	-1.01166	13.8184
mr	1.10987	13.7858
dgt5	1.36551	13.7787
shn	-1.0535	13.7578
rhea	1.00138	13.7475
RpL3	1.01989	13.7385
CG42806	1.00831	13.7343
RpS5a	1.02069	13.7319
CG15209	1.37223	13.7176
Shmt	-1.39975	13.7094
RpS2	1.0186	13.695
Rpb7	-1.59543	13.6873
LamC	1.01466	13.6841
CG11999	-1.04175	13.6794
CG10764	1.0011	13.6771
CG17019	1.0634	13.6732
CG5958	-1.57821	13.6724
CG18446	1.04734	13.67
CG31918	1.02151	13.6696
Non2	-1.3165	13.6604
Txl	-1.03474	13.6571
Pdk1	-1.74714	13.6571
ckn	-1.53131	13.6479
CG14231	1.04099	13.5936
Miro	1.03568	13.5898
mav	1.22253	13.5881
CG44251	1.26892	13.587
Mkk4	-1.01452	13.587
Charon	1.08146	13.5764
alpha-Est9	1.12927	13.5661
lncRNA:noe	1.45027	13.5617
mRpS23	1.00291	13.5598
WASp	1.0513	13.5281
CG7277	1.02234	13.521
p24-1	-1.0419	13.4591
Dph5	-1.39968	13.4051
Sec61alpha	-1.21946	13.4019
Srp14	-1.03964	13.3961
CG5013	1.09115	13.391
Pde9	-1.05486	13.391
Sr-CIV	1.05037	13.3628
thoc7	-1.04555	13.3575
Alg14	1.07077	13.3497
nonA	-1.59353	13.3332
CG3061	1.00025	13.3242
fok	1.02953	13.2983
CG17221	1.17462	13.2922
RpL22	1.01564	13.282
CG33969	1.1184	13.2806
PAN2	1.06523	13.2658
mt:ND6	-1.12879	13.241
Thor	1.16632	13.2304
CG15118	-1.00754	13.2241
CG3420	-1.00666	13.2229
lncRNA:CR43654	1.28535	13.2017
Ptip	-1.63705	13.1885
pyd3	1.10359	13.1737
fne	1.17889	13.1584
CG16734	1.16514	13.1562
CG8786	1.17249	13.1537
CG14879	1.45967	13.1393
l(3)neo43	-1.00191	13.1258
CG30466	1.17207	13.1234
mTerf3	1.13905	13.0928
CG12091	1.00743	13.0528
mtm	-1.01308	13.0231
Aladin	-1.78161	13.0156
Syx16	1.03083	13.0107
FER	1.02003	13.0019
Hel25E	-1.35776	12.9803
Rgl	1.03818	12.9584
Ube3a	1.1152	12.9532
CG18343	-1.00345	12.945
CG9391	-1.04692	12.9336
cta	-1.00035	12.9246
spoon	-1.41066	12.9154
CG5846	1.09407	12.8959
CG14977	-1.04183	12.8627
Esyt2	-1.02079	12.8519
CG12123	1.0932	12.8458
Srp54k	-1.03607	12.8451
SNF4Agamma	-1.05941	12.8424
Mes4	-1.59152	12.8248
Su(z)2	1.0185	12.8217
fz	-1.60281	12.8124
CG3689	-1.02379	12.8079
numb	1.55924	12.8004
CG3792	-1.00035	12.7994
Fatp	1.10504	12.775
His2B:CG33868	1.69159	12.7652
Dip-B	1.02249	12.7302
CG31313	1.55086	12.7129
Mob3	1.02763	12.7105
Gel	1.06934	12.7089
CG17597	-1.01518	12.7076
CG12093	-1.02581	12.6941
Hsp70Bbb	-2.08862	12.6938
PPP1R15	-1.02861	12.6779
Usp10	-1.06841	12.6641
CG9593	1.33038	12.6461
Sox14	1.00504	12.6424
RhoGAP16F	-1.00637	12.6233
CG13197	1.13275	12.6169
CG13901	-1.00894	12.6087
Sgt1	-1.06954	12.6041
CG7133	1.16933	12.5817
l(3)87Df	1.0211	12.5807
CG2199	-1.56744	12.5724
CrebA	-1.48577	12.5594
CG12929	-1.03974	12.5569
dom	-1.04778	12.5569
CG43103	1.27794	12.5519
Ssadh	1.13508	12.541
hang	-1.50017	12.5214
CG46338	1.07262	12.5128
Dredd	1.12122	12.5112
Pfdn1	-1.04004	12.5108
EndoU	1.36091	12.4915
Rab19	1.02947	12.4863
beta'COP	-1.0643	12.4863
sol	1.06132	12.4772
BuGZ	-1.06781	12.4753
CG33635	1.03612	12.4435
Rab39	1.02678	12.4428
CG30414	-1.43263	12.4392
CG31703	1.3313	12.4204
CG3402	-1.01618	12.4193
CG3603	1.1262	12.4072
nonA-l	1.16191	12.3479
CG10465	-1.00016	12.3254
Ric	1.0539	12.3131
BubR1	-1.78129	12.2947
CG17333	-1.03015	12.2855
qkr58E-3	1.00673	12.2765
CG7206	1.13075	12.2615
CG5021	-1.01558	12.2612
CecA1	1.48758	12.2611
lncRNA:CR43334	-1.48757	12.2297
Dpck	-1.60424	12.2095
Hsp26	1.04878	12.2076
CG31109	1.10918	12.1774
Met	1.04499	12.1682
PIG-F	1.06285	12.1571
ND-B17.2	-1.0283	12.1408
PGRP-SC2	1.32355	12.1292
NTPase	-1.68206	12.1259
Arf79F	-1.12687	12.123
CycG	1.02972	12.1122
CG12576	-1.00235	12.0691
CG8080	-1.01489	12.039
eIF4EHP	-1.05091	12.022
CG42748	1.114	12.0205
PhKgamma	-1.00415	12.0129
CG6428	1.0351	12.0062
TBCD	1.0644	11.9946
Uba3	-1.03385	11.9781
Mkrn1	-1.03205	11.9769
CG31223	1.09477	11.9751
Trc8	-1.03176	11.9607
Fen1	-1.6247	11.9468
Spindly	1.24722	11.9354
CG17514	1.01121	11.921
CG4364	-1.00105	11.9154
U2A	-1.03077	11.897
Prosalpha4	-1.22394	11.891
CG8152	1.28046	11.8895
CG11360	1.01691	11.879
CG10932	-1.01195	11.8567
CG17691	-1.03966	11.8555
CG5789	-1.92488	11.8515
U2af38	-1.02244	11.8418
CG33977	-1.02894	11.8414
zda	-1.02383	11.8372
Bap111	1.01362	11.8306
CG1218	-1.65823	11.8281
Pi3K68D	-1.55188	11.8263
mRpS7	-1.04481	11.8249
JMJD7	1.06205	11.8211
wake	-1.73049	11.8209
CG17985	1.0579	11.8084
gce	-1.04941	11.796
SCAP	-1.05324	11.7783
iPLA2-VIA	-1.02577	11.7755
ZnT41F	1.04164	11.7595
mei-218	1.33249	11.742
CSN6	-1.05353	11.7181
NimB5	1.06634	11.6859
CycT	1.00333	11.6756
Ccdc58	-1.0623	11.6675
Uev1A	-1.21993	11.663
CG15531	-1.83839	11.6484
CG10803	1.0068	11.6428
Gdh	1.07461	11.6323
Nipped-B	-1.05006	11.6301
bc10	1.00732	11.6227
x16	-1.46091	11.5877
CG7914	1.24444	11.5834
Rcd4	-1.0355	11.5798
CR41597	-1.03068	11.5763
Alr	1.06633	11.5751
CG8281	1.14639	11.5594
betaGlu	1.08429	11.5326
CG6006	1.14741	11.5009
cni	-1.01361	11.4949
REPTOR	-1.56214	11.4917
pan	-1.06193	11.4862
CG6115	1.01015	11.4845
lncRNA:CR43650	-1.78226	11.4821
Pex10	1.08607	11.4755
Rab10	-1.01412	11.4745
SelT	-1.0254	11.4744
GILT2	1.40743	11.4723
Psn	-1.06136	11.4701
CG1529	1.09084	11.4472
CG5110	-1.04257	11.4436
CR18217	1.06555	11.435
CG11982	1.04598	11.4208
Prosbeta4	-1.18104	11.388
tai	-1.06194	11.3819
CG4617	1.09852	11.3773
fs(1)h	1.00954	11.3717
CG3776	-1.0356	11.3672
CG17278	-1.67407	11.3608
CG12237	-1.01747	11.3578
GlcAT-P	-1.05611	11.3489
dally	1.04523	11.3331
SF1	1.00727	11.3282
GstO2	-1.0595	11.3013
OstDelta	-1.04039	11.2942
mfrn	-1.02852	11.2889
Snap29	-1.03107	11.2808
cact	1.0488	11.2584
CCT2	-1.22135	11.2584
Smg6	1.00377	11.2496
CG34200	-1.03242	11.2496
Cap-H2	-1.83463	11.2271
Echs1	-1.09398	11.1908
CG10616	1.00075	11.1838
CG2493	1.02917	11.1834
VhaAC45	-1.02481	11.1804
Rab30	1.01212	11.1754
CG43133	1.54032	11.1723
CecA2	1.4437	11.1588
CG42788	-2.12239	11.1582
Dpy-30L1	-1.01966	11.1501
CG17904	-1.06252	11.1314
Capr	-1.04666	11.1222
CG15715	-1.0383	11.1171
Hacd2	-1.02472	11.1158
eIF1	-1.09198	11.1147
HDAC1	-1.02897	11.1047
Manf	-1.29338	11.1047
CG14695	1.05923	11.0961
Rb97D	1.00499	11.0895
CG10467	1.01042	11.0849
tna	-1.02464	11.082
mus301	-1.99783	11.0635
jv	1.24256	11.0307
His1:CG33813	1.57969	11.0159
CG18815	-1.02021	11.0086
Vti1b	-1.04323	11.0063
CG4045	-1.04589	11.0023
CG4592	1.09196	11.002
CG3262	-1.05105	10.9982
CG30197	1.4357	10.9889
glu	-1.66232	10.9686
CG12935	-1.00346	10.9674
spen	1.01388	10.9435
CG1316	-1.02388	10.9287
dnc	1.0453	10.9252
CG9471	-1.66013	10.8973
CG17141	1.15471	10.8857
ssh	1.04617	10.8854
CG13563	-1.97816	10.8783
scra	1.01916	10.8778
CG4858	-1.03668	10.8778
dgt4	-1.07119	10.8716
CG10576	-1.15385	10.8688
cyc	-1.81667	10.8389
ninaD	1.22134	10.8378
CG33111	1.05905	10.8286
CG15525	1.05416	10.8194
Cyp12e1	1.25232	10.8095
Moe	-1.08189	10.7852
TyrRS-m	-1.03826	10.7805
CG12025	-1.00219	10.7794
CG2006	1.11311	10.7503
CycY	-1.05786	10.7451
pasi2	1.14014	10.7374
CG15456	1.11233	10.7355
baz	1.00331	10.727
CG6843	1.05388	10.7084
CG13283	1.09269	10.704
Cks85A	-1.02233	10.7031
AttA	2.72214	10.6974
nmo	-1.30919	10.6884
Kap-alpha3	-1.08119	10.6829
cv-c	1.00154	10.6735
GstD10	1.11412	10.6594
GIIIspla2	-1.6224	10.6392
CG32066	-1.0332	10.6311
TTLL12	-1.03728	10.6277
Ilk	-1.03964	10.6255
CG14480	-1.03853	10.6246
vig	-1.0373	10.6242
RtGEF	1.00174	10.6239
Tfb4	1.0708	10.596
mthl8	1.18657	10.5914
CG31360	-1.05493	10.5815
GATAd	-1.01465	10.578
CG44475	1.24503	10.5711
CG12065	1.00222	10.5684
Pak	1.03699	10.5599
CG5793	-1.01613	10.5592
kek1	1.14629	10.5456
CG17337	-1.05032	10.5325
Got1	-1.05658	10.5052
PI31	-1.05658	10.4925
SMSr	-1.00358	10.4829
CG2246	-1.0445	10.4784
Uba1	-1.37663	10.4782
sel	-1.38771	10.4703
CG31549	-1.71905	10.462
Fs(2)Ket	-1.61921	10.4614
sle	-1.00919	10.4489
CG12795	-1.04649	10.4273
JhI-21	-1.80382	10.4259
CG13339	1.15532	10.4254
wech	-1.65167	10.4169
crim	1.1918	10.4103
CaBP1	-1.17453	10.4058
CG1532	-1.03876	10.3901
Alg11	-1.0526	10.3878
Pgant1	1.10841	10.3701
Arc42	-1.06092	10.3656
alpha-Est8	-1.70327	10.3601
CG7120	-1.67592	10.3522
CG1271	1.04401	10.3381
CG44838	-1.9347	10.3224
unc-45	1.01829	10.3098
pll	-1.03963	10.3091
ref(2)P	1.00934	10.3
GlyS	-1.03296	10.2995
E2f1	-1.39661	10.2657
RpS15Ab	-1.17494	10.2426
fal	1.03079	10.2112
Pitslre	-1.01516	10.2015
cyp33	1.00148	10.1962
aru	1.00404	10.1918
c(3)G	1.20403	10.1818
Lsm10	-1.65958	10.1567
su(f)	-1.00685	10.1523
CG13876	1.14825	10.142
Ance-4	1.33748	10.1343
Usp15-31	1.04112	10.1277
Atox1	1.0143	10.1277
CG7766	1.05352	10.0862
CG32579	1.07262	10.0814
Cdc37	-1.06995	10.0694
AdSS	-1.01995	10.0642
CG7627	-1.64811	10.0634
CG5885	-1.12743	10.054
CG11808	1.08559	10.0443
CG30287	1.28588	10.0443
CG7656	-1.03523	10.0443
RanGAP	-1.51274	10.0319
CG9372	-1.07833	10.0247
Bet1	-1.06916	10.0236
lncRNA:CR44042	1.08131	10.0116
CG12343	-1.02827	10.0074
glo	-1.04251	10.0041
CG31211	1.10078	9.99847
CG16953	-1.02894	9.98437
CSN3	-1.01546	9.98355
CG17065	-1.0419	9.97851
Mes2	-1.01778	9.96578
Tango9	1.00157	9.95501
CG8111	-1.03446	9.95129
CG1927	-1.03302	9.9504
Srp72	-1.01181	9.94361
CG12547	1.00677	9.93392
ZAP3	-1.06988	9.93392
Impbeta11	1.09253	9.92817
CG11050	-1.53169	9.91989
Bdbt	1.00329	9.90163
Art1	-1.41492	9.87586
wts	-1.05194	9.86803
Msh6	-1.97887	9.8619
LBR	-1.61565	9.85696
CG13390	1.09484	9.85126
CG7139	-1.00129	9.84229
kune	1.03548	9.81181
sqz	-1.81382	9.81147
CG4586	1.17731	9.81065
CG8974	-1.05743	9.77818
CG31915	-1.61221	9.75552
Sec71	1.1227	9.75161
Actn	1.01271	9.74856
Tmem18	-1.01721	9.74314
Mvb12	1.00101	9.74303
Ac76E	1.00481	9.74131
His1:CG33804	1.48946	9.73514
CG4953	1.13785	9.71665
CG10337	1.08164	9.70363
Slik	-1.07943	9.68519
Sms	-1.55001	9.68281
Cul1	-1.03545	9.67651
CG8671	-1.03404	9.66715
mib1	1.04972	9.66286
CG8892	-1.00675	9.65508
Tgt	-1.01911	9.6515
Dic1	-1.52009	9.64434
CG12177	1.2176	9.63463
Lip4	1.70947	9.61729
arx	-1.01765	9.61729
CG5068	1.01572	9.61141
RagC-D	-1.06409	9.59506
Drep2	-1.89059	9.56593
CG14104	-1.00975	9.562
Dro	1.93602	9.56174
Bx42	-1.07259	9.55245
Vps36	-1.00372	9.54501
CG7781	1.19259	9.5441
Trxr-1	-1.07541	9.51635
Psa	-1.51407	9.49739
sano	-2.9879	9.49113
Nipped-A	-1.06599	9.48949
Sld5	-1.74811	9.45829
CG17681	1.15882	9.44594
pita	1.01365	9.44503
UbcE2H	-1.05646	9.43839
Taf13	-1.01865	9.42225
pico	-1.10622	9.41505
CG3164	-1.03196	9.40466
CG7546	-1.05673	9.40026
lawc	-1.49721	9.39157
CG9967	1.29917	9.38166
CG13321	1.46231	9.353
asRNA:CR43257	1.22258	9.35104
Lon	-1.0489	9.32313
CG13096	-1.46611	9.31576
S2P	1.03519	9.31453
CG7523	1.1924	9.29895
CG31957	-1.52395	9.29111
Bruce	-1.02326	9.28444
AcCoAS	-1.00695	9.28399
AdipoR	-1.0543	9.28399
CG9215	1.04694	9.28245
CG14817	-1.07046	9.27211
tkv	1.17387	9.27174
Zir	1.04638	9.25831
Atg12	1.00121	9.24153
CG7182	-1.50481	9.23558
CG4887	1.05069	9.23394
Odj	1.08133	9.23283
CG3645	1.06922	9.22815
Rchy1	1.06179	9.22193
CG4927	-1.00724	9.20692
Prx2540-2	1.2716	9.20656
CG9117	1.19715	9.20423
Irk1	1.16636	9.19775
asRNA:CR43629	1.16428	9.1959
hpRNA:CR32207	1.1117	9.17522
ebd1	-1.69427	9.16612
Hat1	-1.60075	9.16257
Reph	-2.07357	9.15824
Ir76a	1.18823	9.15269
CG5590	-1.05244	9.15181
Prosalpha7	-1.17974	9.14557
CG4338	-1.06182	9.13876
snz	1.01591	9.13615
CG14696	-1.62883	9.13041
sn	-1.86806	9.12421
CG30456	-1.01576	9.12242
PAPLA1	1.03462	9.11292
CG12375	-1.03586	9.10793
CG3337	-1.02808	9.10679
aralar1	-1.56649	9.10185
CG9240	-1.05042	9.09985
Stim	-1.03774	9.09063
mRpL48	-1.0684	9.08798
Uhg4	-1.04463	9.08309
Snx3	-1.03361	9.08041
Pfdn6	-1.03582	9.08041
lncRNA:CR42549	1.0036	9.06498
CG11284	-1.01526	9.05133
shi	-1.07651	9.03878
YME1L	-1.0802	9.02285
128up	-1.09302	9.01724
Zip102B	-1.03245	9.00666
mRpL52	-1.40595	8.99851
PPO2	1.34287	8.99744
COQ7	-1.0882	8.99593
CIA30	-1.01336	8.99212
CG4991	1.16769	8.98752
CG12171	-1.41391	8.97981
CG18048	1.14546	8.97935
CG34228	1.01586	8.97867
Ufd1-like	-1.06595	8.97867
CG32409	-1.46058	8.97735
mu2	-1.78779	8.97652
CG32687	1.22577	8.97435
Cbs	-1.77914	8.97435
Liprin-beta	-1.05025	8.97208
PGRP-LE	1.00609	8.95736
Dsp1	-1.04216	8.95465
Coprox	-1.06168	8.95033
srl	-1.53534	8.94664
tos	-1.78643	8.9438
CG10126	1.18976	8.94367
su(Hw)	-1.49592	8.94357
mdy	-1.76205	8.94217
Mlh1	-1.67382	8.93807
Pcf11	-1.05288	8.93747
Rbfox1	-1.07154	8.93747
CG17754	1.04421	8.93107
CG34008	1.22075	8.91798
CG31648	-1.06503	8.91292
CG7130	1.13802	8.9119
mRpS31	-1.04334	8.91165
lncRNA:CR32582	1.04228	8.91056
mRpL24	-1.07238	8.90644
CG15027	-1.50111	8.90644
CG42271	-1.03944	8.87689
yki	-1.01191	8.86461
CG17683	-1.04755	8.8579
CG17385	-1.09085	8.84886
mew	1.03723	8.84522
Atf6	-1.1014	8.83834
mRpL43	-1.05165	8.83528
msl-2	1.10395	8.83436
CG15673	1.2141	8.83393
beta-Man	-1.04536	8.82446
Sxl	-1.08018	8.80555
Snx16	1.0284	8.80152
Dscam4	1.04554	8.77453
PDCD-5	-1.06886	8.76136
CG13689	1.05315	8.74745
CG33695	1.02923	8.74185
mRpS17	-1.09049	8.73484
Tsp39D	1.21562	8.73335
CG4281	1.00736	8.72444
CG7737	-1.85086	8.72422
Mp	-2.02367	8.71152
Fibp	1.02256	8.7109
TfIIA-S	-1.01363	8.70805
tej	-1.84884	8.70712
Cdc42	-1.05649	8.69922
Npc2g	-1.59337	8.69354
His2B:CG17949	1.541	8.69326
endos	-1.12061	8.68552
CG11125	1.4161	8.67651
CG9773	1.04007	8.676
CG18011	-1.6588	8.66838
sced	-1.76012	8.66576
CG7878	-1.07539	8.66203
Use1	1.0487	8.64076
CG31051	-1.70004	8.62485
Ravus	1.15996	8.62394
CG8187	1.04079	8.61381
CG7600	1.00311	8.60823
mEFTu2	-1.01251	8.59602
asRNA:CR46140	1.2052	8.59018
Pebp1	1.28052	8.58426
CG7142	1.0095	8.58197
CG40045	-1.14408	8.58056
CG7927	-1.07037	8.57577
CG1103	-1.06921	8.56938
CG11752	-1.2176	8.56397
DCTN3-p24	-1.05569	8.54617
CG17556	-1.51161	8.54169
CG16890	1.24608	8.52449
Ppt2	1.18307	8.52318
E(spl)mbeta-HLH	-1.0312	8.51327
CG30383	-1.85617	8.51165
lin-52	-1.54367	8.50931
Rad23	-1.05693	8.50152
CG7920	-1.27358	8.49444
CG10939	-1.80043	8.49121
CG9425	-1.07999	8.48681
Pdxk	-1.01674	8.47536
CG9588	-1.03938	8.47446
Arfrp1	1.00523	8.47383
mthl2	-1.09438	8.47342
CG12173	-1.0788	8.47061
DNApol-iota	1.18579	8.46601
Mondo	1.01009	8.45355
CG3165	-1.03588	8.44739
CG17565	-1.06552	8.44247
CG17807	1.08173	8.43795
Sec31	-1.08229	8.4344
Sema5c	1.05334	8.43417
Uhg5	-1.44887	8.43354
RhoGAP5A	1.05688	8.41854
[truncated: 7,435 more rows]

## Sheet: Figure 2-figure supplement 2E
WT	Hml>PvrRNAi	CHIZ>PvrRNAi
0.333	0.365	0.919
0.299	0.645	0.153
0.141	0.371	0.574
0.305	1.05	0.134
0.277	0.71	0.0896
0.305	0.939	0.608
0.274	0.519	0.214
0.361	0.781	0.404
0.173	0.39	0.786
	1.06	0.676
	0.267	0.973
