# Supplementary material for: Paths and pathways that generate cell-type heterogeneity and developmental progression in hematopoiesis
Source: eLife. 2021 Oct 29;10:e67516. doi: 10.7554/eLife.67516 (PMC8610493; doi:10.7554/eLife.67516)
Supplement: Figure 4—source data 1. [file elife-67516-fig4-data1.xlsx]

## Sheet: Figure 4D, I, P
Number of Hml-DsRed+ cells			Number of Hml-DsRed+ Cells			Number of Hnt+ cells
domeMESO>			Tep4>			Hml>
WT	pntRNAi		WT	pntRNAi		WT	pntRNAi1	pntRNAi2
2053	19		3119	964		3	246	283
1859	4		1443	270		55	178	187
1674	4		1829	2317		16	48	144
1717	1		1747	3748		114	99	357
1550	7		3156	2059		2	193	130
1580	11		2767	36		7	83	92
1386	12		1552	507		0	67	65
387	3		2040	833		43	270	138
2309	16		1796	658			119	260
909	8		923	1060			45	192
1995	5		1531
			260

## Sheet: Figure 4-figure supplement 1A-F
Number of GFP+ cells			Number of Total cells			Number of GFP+ cells			Number of Total cells			Number of Hnt+ cells			Number of Hnt+ cells
domeMESO>			domeMESO>			Tep4>			Tep4>			domeMESO>			CHIZ>
WT	pntRNAi		WT	pntRNAi		WT	PntRNAi		WT	PntRNAi		WT	pntRNAi		WT	pntRNAi1	pntRNAi2
457	2379		3130	2706		522	727		4902	2081		256	144		70	16	7
791	1640		3114	1891		901	680		2708	1257		148	158		19	10	16
823	989		3050	1055		690	511		3057	3927		173	8		63	14	94
1480	2290		3624	2529		509	464		2537	5277		120	74		23	24	12
1094	1645		2923	1942		1391	559		5019	3815		90	142		38	16	2
908	1625		3087	2051		593	2217		3957	2972		108	125		11	32	15
806	920		2708	1170		355	512		3628	2537		149	147		69	43	16
1139	1650		2139	1793		1277	539		3740	2330		13	23		18	14	13
768	1755		3557	2005		106	844		3879	2455		244	99		31	8	35
658	1431		1740	1542		960	170		3071	1954		68	17
1326	1744		3871	2037		873			3304			152	182
						1345			2157
