# Supplementary material for: Paths and pathways that generate cell-type heterogeneity and developmental progression in hematopoiesis
Source: eLife. 2021 Oct 29;10:e67516. doi: 10.7554/eLife.67516 (PMC8610493; doi:10.7554/eLife.67516)
Supplement: Figure 5—source data 1. [file elife-67516-fig5-data1.xlsx]

## Sheet: Figure 5A
	PL				iCC				mCC
E(spl)m3-HLH	1.25657	1.0399	1.54502	2.84583	38.3361	47.4108	38.1748	62.4093	19.5262	22.2675	27.0416	30.1478
cv-c	48.154	45.0918	51.8015	53.9576	274.077	257.166	256.848	148.292	157.139	159.118	144.176	137.81
CG3847	82.7313	90.7221	88.5036	89.3096	192.393	182.339	169.887	136.034	81.0373	82.2499	90.4498	89.1677
	PL				iCC				mCC
E(spl)m3-HLH (%)	2.6975	2.23237	3.31672	6.10919	82.2968	101.778	81.9505	133.975	41.9172	47.802	58.0507	64.7188
cv-c (%)	20.5702	19.2621	22.1283	23.0494	117.079	109.855	109.719	63.3467	67.126	67.9713	61.5885	58.8691
CG3847 (%)	48.6188	53.3147	52.011	52.4847	113.064	107.155	99.8376	79.9432	47.6233	48.3359	53.1547	52.4013

## Sheet: Figure 5B
	PL				iCC				mCC
CG32369	63.0612	53.8271	54.3517	55.2166	353.797	294.512	352.819	217.531	637.157	653.626	635.288	554.249
IP3K2	67.4979	76.9447	84.8494	63.158	294.114	285.168	259.249	149.663	696.046	709.929	623.309	433.619
bnl	0.152914	0.1734	0.149008	0.141601	0.492007	1.18689	0.232077	0.572174	16.5647	17.0852	16.1987	15.0576
	PL				iCC				mCC
CG32369 (%)	10.1699	8.68067	8.76527	8.90475	57.0567	47.4958	56.8989	35.0811	102.754	105.41	102.453	89.3835
IP3K2 (%)	10.9623	12.4966	13.7804	10.2575	47.767	46.3141	42.1046	24.3068	113.045	115.299	101.232	70.424
bnl (%)	0.942369	1.06862	0.918298	0.87265	3.03211	7.31449	1.43023	3.52616	102.084	105.292	99.8284	92.7961

## Sheet: Figure 5E
	PL				iCC				mCC
total sima	154.471	144.413	152.204	155.203	115.286	117.981	124.69	95.1239	150.173	157.294	140.189	139.225
sima-RA	123.954	105.697	116.12	117.846	59.4879	68.0118	69.4493	48.5622	45.5944	46.8541	51.6912	50.2734
sima-RB	0.00187081	0.000635876	0.294091	0.00740594	0.00128252	0.00867557	0.00595068	4.89299	0.000100007	0.0001	0.000102895	0.000100015
sima-RC	29.8281	37.9703	34.9154	36.2876	55.6855	49.4369	54.4624	41.5658	104.134	110.673	89.3243	89.3797
sima-RD	0.688276	0.746625	0.876418	1.0639	0.620475	0.962738	1.27938	0.391127	1.51571	0.892711	0.199636	0.65347

## Sheet: Figure 5K
	PL				iCC				mCC
numb	4.55057	4.80052	5.93782	5.04696	141.223	158.667	129.003	103.832	215.426	242.293	236.709	222.996

## Sheet: Figure 5O
	Numb+Sima+ (cells)	Numb+Sima- (cells)	Numb-Sima- (cells)	Numb-Sima+ (cells)
lz>w1118	135	42	43	1
lz>numbRNAi	5	0	106	0
	Numb+Sima+ (%)	Numb+Sima- (%)	Numb-Sima- (%)	Numb-Sima+ (%)
lz>w1118	61	19	20	0
lz>numbRNAi	5	0	95	0

## Sheet: Figure 5-figure supplement 1E-F
	PL			iCC			mCC
sima-RA/RB	1	0.1678	1.5124	1.1819	0	0.3482	0.79	2.796	0.2862
sima-RC	1	0.4311	0.6801	0.0005	0.0009	0.0007	2.745	2.0431	1.9327

## Sheet: Figure 5-figure supplement 1M
lz>
WT	NumbRNAi
72.51	22.83
61.31	23.05
88.05	25.64
96.34	21.1
79.42	24.56
77.71	23.48
42.69	20.3
89.67	31.44
50.72	20.26
37.58	26.12
61.26	19.04
30.55	22.93
66.77	20.13
32.54	19.55
49.64	14.44
53.77	15.67
52.93	17.14
33.65	19.11
46.32	18.84
22.71	16.38
48.05	16.91
46.19	12.43
28	17.48
33.75	13.95
43.2	14.98
54.28	19.33
36.48	13.27
19.72	13.11
40.03	11.87
28.27	11.66
51.67	43.04
44.07	42.73
42.16	34.41
86.34	36.96
49.61	25.36
78.27	36.83
58.88	29.15
52.26	28.16
61.41	29.02
59.2	34.69
91.49	27.01
47.2	30.48
32.86	22.3
65	19.07
47.06	25.45

## Sheet: Figure 5-figure supplement 2D
lz>
NotchRNAi	WT	NotchACT
7071.52	2547.63	4526.56
2571.38	1875.5	3900.66
3582.12	2768.46	4549.29
4425.49	1129.06	1891.2
845.19	1820.6	3592.21
938.54	2711.09	3451.59
3720.35	2319.58	4866.75
3860.85	2491.1	4899.38
1531.61	1954.92	4037.32
2114.08	2428.77	6761.9
2296.62	2176.47	4677.29
4208.14	1834.89	6926.01
5204.7	1836.16	865.43
2654.67	987.14	4956.55
3943.51	1408.8	6451.9
5132.66	906.64	3961.36
4462.25	1326.33	5752.54
5207.97	1482.23	4458.06
2930.09	857.49	4117.61
2882.62	504.53	7974.18
4365.07	2025.9	5517.6
2570.83	1733.65	3691.88
1374.55	1049.36	2754.37
1474.15	2190.32	5257.94
1508.75	2060.88	4470.51
4994.12	2081.1	3711.03
2447.7	2455.43	4525.44
1645.88	3091.26	5956.26
2420.54	1125.06	2815.83
3224.35	1426.75	1979.92
3190.7	1650.41	2670.06
1414.69	2158.52	5227.13
1600.68	890.29	3741.31
1320.75		2926.5
1812.79		3003.53
2571.32		4696.87
1695.67		3753.16
1941.28		3343.07
2469.7		2925.59
2366.55		3229.1
2573.26		3709.55
2394.18		2436.68
1756.08		3628.89
1916.97		5099.68
1886.76		2672.9
1434.1		2193.68
1888.71		1707.29
1418.21		1456.61
1498.53		1676.66
907.11		2420.75
792.22		3139.16
		3581.07
		773
		1266.91
		1187.1
		1709.71
		1834.5
		1494.35
		1401.09
		11122.3
		4608.76
		7011.11
		7133.17
		6042.37
		3595.45
		3212.92
		4009.9
		2739.03
		6207.49
		3088.29
		2985.08
		6818.79
		8420.5
		7063.94
		6373.33
		2064.21
		1188.2
		3975.51
		4225.02
		9389.5
		1607.33
		6119.24
		5362.16
		6478.61
		4051.56
		4335.33
		7735.49
		5524.19
		6273.62
		8820.33
		2896.79
		3189.61

## Sheet: Figure 5-figure supplement 3H-I
PPO intensity			number of PPO+ cells/LG
lz>WT	lz>numbRNAi		lz>WT	lz>numbRNAi
17	24		59	165
42	69		137	98
21	41		272	106
19	53		124	65
19	59		54	124
26	69		286
21	69
26	76
39	54
38	29
21	25
41	19
50	29
36	43
90	44
22	14
79	31
27	17
39	34
29	14
28	35
105	30
30	42
36	28
23	46
43	13
62	56
16	57
160	24
32	48
27	44
79	83
173	17
22	14
27	63
33	19
14	53
19	37
25	17
30	21
39	45
28	36
45	39
192	42
55	37
203	21
36	23
56	21
195	30
96	66
24	51
18	45
22	56
14	34
35	68
25	41
20	45
49	43
26	17
40	15
31	31
40	51
134	24
30	85
31	25
27	31
39	35
31	10
16	28
23	28
43	38
37	30
29	26
35	41
17	20
19	29
43	37
20	34
20	23
24	20
38	22
43	37
19	28
40	23
38	27
48	33
14	27
37	18
66	75
139	22
47	38
40	42
22	12
34	33
41	45
26	32
22	33
34	19
34	64
47	24
18	26
38	32
24	23
16	26
39	24
25	20
30	43
42	40
42	13
40	31
36	41
23	34
36	45
56	28
38	24
33	18
36	36
18	20
61	17
21	18
23	44
70	16
37	33
32	42
32	53
44	28
29	18
36	27
25	38
32	64
25	17
14	30
24	10
30	22
22	24
31	24
26	21
42	27
17	13
15	17
49	23
37	30
14	24
33	19
26	30
17	22
26	30
42	25
31	32
43	40
26	36
72	13
36	19
30	16
32	22
20	17
63	52
37	34
20	22
41	35
48	52
24	25
32	23
22	42
19	19
29	18
55	61
32	51
46	38
21	25
26	67
26	17
29	45
20	45
24	59
28	73
36	39
23	52
23	29
22	31
42	38
29	21
15	15
15	29
33	32
44	47
41	62
50	13
25	52
40	25
18	51
41	35
33	33
15	21
33	30
41	35
75	38
19	24
43	47
40	24
57	45
52	49
41	34
24	46
36	20
40	21
50	17
49	39
27	66
38	15
37	19
36	11
47	35
51	16
40	33
18	28
55	33
55	28
44	16
30	73
47	57
49	30
41	26
28	17
32	39
63	47
43	42
45	31
21	31
35	48
56	20
25	28
54	13
44	36
29	14
48	29
30	13
41	29
19	15
50	13
31	31
43	15
40	32
19	36
24	31
44	16
36	30
25	27
41	44
33	37
33	15
34	10
18	13
18	18
26	32
38	38
15	17
32	26
19	20
33	30
13	17
36	21
34	25
26	63
28	34
28	25
25	39
42	39
35	38
48	41
29	22
26	21
19	27
27	28
21	29
41	40
26	29
21	25
25	25
49	23
31	30
34	42
43	30
24	22
27	40
39	38
22	40
41	31
32	24
29	23
32	43
20	28
17	32
13	24
26	28
45	22
28	38
37	76
29	26
45	25
44	25
24	28
21	28
22	23
23	19
26	37
40	30
19	24
67	20
35	23
18	25
23	19
25	20
16	37
21	24
24	35
33	37
36	25
47	32
18	24
29	28
21	30
25	28
26	21
30	29
24	23
18	39
40	30
29	19
27	40
23	25
40	21
17	31
30	36
32	28
30	36
38	21
53	16
31	27
28	38
24	33
24	17
26	23
42	21
22	42
32	19
34	28
47	37
14	33
45	30
29	24
23	22
27	27
21	24
21	21
25	22
26	28
23	24
32	19
21	18
23	26
20	23
32	22
19	29
26	24
22	21
14	23
36	29
22	29
21	36
21	35
20	29
21	40
48	31
57	44
66	36
78	32
60	32
46	14
22	25
22	23
14	81
59	53
51	78
51	41
18	26
50	34
20	29
48	22
48	36
66	44
75	63
29	32
41	23
21	30
53	45
72	31
25	43
18	36
60	30
82	26
78	19
62	24
39	42
75	24
71	32
28	38
87	20
66	36
54	37
75	17
55	36
25	31
50	22
21	22
25	34
49	24
56	28
59	34
16	25
36	26
16	37
42	46
40	27
28	14
20	16
17	13
75	30
37	15
16	29
25	22
13	23
21	29
46	17
49	47
65	29
40	39
60	55
37	40
38	31
73	44
16	41
52	49
59	54
18	39
49	37
19	38
36	29
20	32
72	22
19	36
25	27
41	46
57	20
77	34
56	33
22	20
54	24
53	47
21	39
19	28
24	37
23	36
34	49
36	26
24	34
39	33
33	38
76	26
15	16
52	31
54	28
35	20
22	28
37	46
41	41
27	25
15	43
27	28
33	24
14	34
17	26
17	24
49	29
20	43
38	31
55	29
48	33
18	48
24	41
43	24
50	35
40	21
35	22
52	38
24	14
31	20
26	25
46	20
25	17
25	27
75	27
21	32
34	17
20	29
62	25
49	24
42	27
54	11
27	49
61	31
49	17
55	20
41	17
36	32
26	20
22	24
26	49
17	39
40	40
41	20
70	16
39	20
14	13
36	26
54	35
27	19
30	27
44	30
26	49
44	22
33	21
42	27
23	23
25	38
28	12
26	29
58	37
44	27
31	21
27	24
34	23
34	20
48	25
45	32
34	33
68	29
18	20
42	25
31	26
29	28
23	18
35	36
30	34
16	22
65	24
24	23
30	17
34
16
15
32
33
49
21
30
24
18
48
29
17
47
34
33
26
61
15
16
19
41
44
41
42
38
32
34
34
48
18
58
42
42
48
30
28
34
44
19
19
29
29
27
40
35
16
18
31
37
41
20
41
29
35
37
34
61
56
20
61
54
23
17
53
15
54
46
36
43
25
36
42
76
37
29
17
49
43
25
15
46
45
19
29
41
34
15
19
16
25
18
56
36
65
20
17
26
43
45
42
34
45
21
29
31
42
63
42
45
31
32
28
15
54
87
41
26
28
17
18
18
19
19
30
30
23
36
34
30
35
29
44
23
27
37
23
36
24
34
35
39
37
34
34
19
48
22
36
37
29
35
48
21
17
26
22
31
31
43
37
62
42
35
38
18
21
22
25
20
89
27
60
172
21
20
30
255
153
255
32
193
243
81
112
20
14
28
18
19
46
30
124
30
32
26
15
27
23
15
37
41
28
22
21
47
18
27
33
21
36
23
34
14
35
45
34
32
24
14
18
31
22
29
23
26
36
32
26
35
35
19
31
41
17
38
18
32
42
40
25
33
28
53
38
23
21
20
34
21
24
32
37
24
28
24
19
26
76
26
33
30
26
21
41
33
18
16
27
21
19
14
31
25
30
28
52
39
37
27
23
35
20
24
26
41
24
19
21
19
22
24
30
19
22
26
20
24
25
21
31
26
18
26
35
18
30
24
17
25
19
31
26
29
30
22
19
25
18
29
23
31
22
18
19
26
20
33
20
21
17
24
34
22
26
30
17
21
23
28
18
26
23
29
15
19
34
19
19
34
14
19
22
25
26
18
18
17
17
19
24
21
17
22
21
