# Supplementary material for: Paths and pathways that generate cell-type heterogeneity and developmental progression in hematopoiesis
Source: eLife. 2021 Oct 29;10:e67516. doi: 10.7554/eLife.67516 (PMC8610493; doi:10.7554/eLife.67516)
Supplement: Figure 6—source data 1. [file elife-67516-fig6-data1.xlsx]

## Sheet: Figure 6D
	PL				iCC				mCC
msi	119.651	105.365	116.316	115.479	55.0781	56.7077	61.8505	71.4026	37.5127	35.1228	41.6623	41.8698

## Sheet: Figure 6J, M
lz-GAL4>			Hml-GAL4>
WT	msiRNAi		WT	msiRNAi
80.1137	115.427		2523.46	5999.45
51.2166	149.165		3040.24	2786.66
37.6501	69.3069		4728.9	3285.95
112.173	72.4352		3177.11	1880.21
63.7077	79.0893		5472.09	7051.84
77.5333	192.878		3402.05	4546.33
64.3463	155.084		3510.96	3376.96
30.5445	151.783		1296.07	9038.29
77.5089	144.964		1984.75	7150.93
58.9452	151.795		7326.99	6540.02
23.0409	169.926		4146.22	6112.24
62.5359	199.675		4631.84	9688.57
73.6343	155.623		1135.41	8844.29
48.7807	51.6915		2775.88	6781.05
38.1995	115.656		2500.28	7302.06
26.6735	42.0129		1508.82	5640.91
38.0691	58.3907		1205.76	7189.53
27.3426	107.253		2061.19	5899.56
59.9845	48.9439		2035.88	4319.66
39.0443	61.062		5826.09	2314.66
32.1091	145.238		4400.35	8791.26
46.5538	89.9974		4706.08	2471.72
97.0718	81.1566		2589.4	5739.8
25.6077	79.093		3844.05	6220.66
45.6919	163.798		4736.01	10109
96.1853	128.617		2158.71	6630.15
56.4578	45.1624		2673.44	2549.88
38.8797	93.0619		2959.74	2062.88
55.4949	57.9342		2673.2	1825.36
74.5536	64.7285		989.01	5572.32
61.441	108.445		5274.93	5543.44
47.0154	87.1615		2465.11	6806.47
65.4884	133.919		2633.53	1521.28
35.2072	65.9948		3027.97	8255.49
89.3664	138.242		1297.24	3080.63
100.87	63.4501		1404.05	2677.15
85.289	144.433		3162.48	4555.09
31.8575	128.908		2052.33	3966.58
36.0672	30.8243		4308.91	4993.2
32.7726	64.3196		7674.53	8708.55
28.5247	76.0842		4278.87	3191.33
29.7415	76.8828		6747.14	9768.76
48.0829	42.6554		6062.72	8432.57
40.171	52.4613		6512	12027.9
24.6199	70.8036		8725.16	5230.12
54.9584	76.3455		3840.11	7527.33
72.5501	106.276		3592.48	1741.98
45.7876	68.8198		1521.66	7386.66
46.2443	113.717		3700.11	4677.03
12.8586	92.145		6531.03	7869.3
28.7232	111.894		1022.02	8743.18
26.4238	44.0885		4598.06	3827.02
19.3984	63.1645		1127.84	3865.52
25.1846	73.0827		2398.15	10121.6
45.4427	103.365		5894.01	5774.86
13.659	88.5219		6074.38	9712.91
11.389	78.7143		4417.74	8800.46
36.7106	66.0787		3292.3	5685.99
9.92602	38.3699		10301.5	4451.45
12.2208	91.4617		1455.31	7264.32
30.1535	41.7841
45.8149	45.2763
18.5318	43.574
18.323	33.0568
34.6442	45.3542
6.9433	79.5281
34.1816	67.9304
53.1525	77.8772
8.50396	43.051
57.7308	65.449
50.6146	38.3694
34.8193	36.2088
13.8992	83.6769
16.1628	40.7345
28.1298	78.1369
16.7953	32.4391
22.381	94.3607
14.8612	23.8211
28.2157	28.8796
17.9207	83.0387

## Sheet: Figure 6-figure supplement 1G
WT	msi RNAi
1	0.337589
1.06428	0.33124
1.13176	0.323117
0.638757	0.284964
0.819059	0.269562
0.863423	0.278701
