# Supplementary material for: Paths and pathways that generate cell-type heterogeneity and developmental progression in hematopoiesis
Source: eLife. 2021 Oct 29;10:e67516. doi: 10.7554/eLife.67516 (PMC8610493; doi:10.7554/eLife.67516)
Supplement: Supplementary file 4. [file elife-67516-supp4.xlsx]

## Sheet: AUCell Gene Lists
AUC list	Corresponding Figures	Source	Glycolysis	TCA cycle	Oxidative phosphorylation	Myc activated genes	TOR upregulated genes	De novo ceramide sythesis	AP1 targets	Notch pathway	Mitotic G2/M transition	Intra-S DNA damage checkpoint	Equilibrium signal components	Basemement membrane organization	Collagen secretion	Hydroxyproline production	Basement membrane secretion	Ras protein signal transduction	Sugarbabe dependent genes	Pentose phosphate pathway	Peroxisomal FAO	Mitochondrial FAO	Fatty acid synthesis	Lipid signaling	autophagy-related complexes	Chaperone-mediated protein folding	srl-dependent genes	ribosome biogenesis
Glycolysis	Figure 3A; Figure 1-figure supplement 3A; Figure 3-figure supplement 1E	Custom gene lists made by Mark Sharpley in our lab modified from Drosophila metabolism gene lists by Jason Tennessen	Hex-A	Acon	ND-13A	Bka	Surf6	lace	Abl	Dl	twe	mre11	Pvr	Col4a1	AP-2alpha	pdi	Pis	14-3-3epsilon	ACC	CG30499	CG9527	Thiolase	AcCoAS	Gk2	Atg1	Hsc70-1	AIF	CkIIbeta
TCA cycle	Figure 3A	Custom gene lists made by Mark Sharpley in our lab modified from Drosophila metabolism gene lists by Jason Tennessen	Pgi	CG5214	ND-13B	CG10286	CG8939	Spt-I	Pfas	dsh	tefu	Rad9	STAT92E	LanA	Hrs	PH4alphaEFB	Crag	14-3-3zeta	ATPCL	Pgd	CG17544	CPT2	FASN1	Lpin	Atg13	Hsc70-2	ATPsynB	Fib
Oxidative phosphorylation	Figure 3C	Custom gene lists made by Mark Sharpley in our lab modified from Drosophila metabolism gene lists by Jason Tennessen	Pfk	SdhC	ND-15	CG1074	CG6724	CG10425	al	dx	stg	Hus1-like	ADGF-A	hep	tango1	Plod	sktl	alph	AcCoAS	CG8036	Acox57D-p	Mtpalpha	FASN2	Plc21C	Atg17	Hsc70-3	ATPsynE	sbr
Myc activated genes	Figure 3C	Herter, E.K., Stauch, M., Gallant, M., Wolf, E., Raabe, T., Gallant, P., 2015. snoRNAs are a novel class of biologically relevant Myc targets. BMC Biology 2013 11:1 13, 25. doi:10.1186/s12915-015-0132-6	Ald	SdhB	ND-18	CG11089	l(2)k09848	schlank	AnxB10	gro	puc	CG10336	bip1	Pxn	sec23		Sec23	alpha-Catr	Alp12	Rpi	Mfe2	wal	FASN3	laza	Atg101	Hsc70-5	ATPsynF	Bka
TOR upregulated genes	Figure 3C	Guertin, D.A., Guntur, K.V.P., Bell, G.W., Thoreen, C.C., Sabatini, D.M., 2006. Functional genomics identifies TOR-regulated genes that control growth and division. Curr Biol 16, 958–970. doi:10.1016/j.cub.2006.03.084	Gapdh1	SdhA	ND-19	CG11180	Nopp140	ifc	aop	H	p115	mms4	RpS8	Rab10	shi		Sec24CD	Als2	CCHa2	CG17333	Acox57D-d	colt	ATPCL	Pld	Atg5	Hsp22	ATPsynG	CG4038
De novo ceramide sythesis	Figure 3-figure supplement 2B-D	Kraut, R., 2011. Roles of sphingolipids in Drosophila development and disease. J Neurochem 116, 764–778. doi:10.1111/j.1471-4159.2010.07022.x	Gapdh2	Nc73EF	ND-20	CG11583	CG12499		bru1	mam	nbs	Tctp	Nup98-96	vkg				Arf79F	CG11899	Taldo	CG9577	Echs1	ACC	CG10602	Atg12	Hsp23	ATPsynO	mt:lrRNA
AP1 targets	Figure 1-figure supplement 3A; Figure 3-figure supplement 2B	TF:M00199	Tpi	Men	ND-23	CG12909	CG5114		Arr1	numb	mus304	Fancd2		sktl				ArfGAP1	CG11912	Zw	CG5009	CG12428		sws	Atg16	Hsp26	ATPsyngamma	mt:srRNA
Notch pathway	Figure 2-figure supplement 3H	KEGG:04330	Pgk	kdn	ND-24	CG13096	Sas10		Pka-C2	Ser	mus101	mus81		Crag				aru	CG12224		CG4586	CG6178		bbc	Atg6	Hsp27	Alas	Ssl
Mitotic G2/M transition	Figure 2-figure supplement 1D; Figure 2-figure supplement 2A	GO:0000086	Pglym78	CG1544	ND-30	CG15027	Nop60B		Cp19	N	mre11			Timp				ave	CG12355			whd			Atg14	Hsp67Ba	CG10214	smid
Intra-S DNA damage checkpoint	Figure 2-figure supplement 1E	GO:0031573	Eno	Idh	ND-39	CG1785	l(2)k09022		Cp36	Su(H)	mei-41			Pten				betaggt-I	CG1246			Arc42			Pi3K59F	Hsp67Bc	CG10932	Ran
Equilibrium signal components	Figure 2-figure supplement 2A-B	Mondal, B.C., Mukherjee, T., Mandal, L., Evans, C.J., Sinenko, S.A., Martinez-Agosto, J.A., Banerjee, U., 2011. Interaction between differentiating cell- and niche-derived signals in hematopoietic progenitor maintenance. Cell 147, 1589–1600. doi:10.1016/j.cell.2011.11.041 and Mondal, B.C., Shim, J., Evans, C.J., Banerjee, U., 2014. Pvr expression regulators in equilibrium signal control and maint…	Pyk	Mdh1	ND-42	CG18600	NHP2		csw	Bx42	kay			Ndg				C3G	CG12490			CG7461				Hsp68	CG10932	pcm
Basemement membrane organization	Figure 1-figure supplement 3A; Figure 2-figure supplement 3H	GO:0071711		Mdh2	ND-49	CG2003	bys		Ddc	fng	grp			SPARC				ca	CG12885			CG12262				unc-45	CG10932	emb
Collagen secretion	Figure 1-figure supplement 3A; Figure 2-figure supplement 3H	Zang, Y., Wan, M., Liu, M., Ke, H., Ma, S., Liu, L.-P., Ni, J.-Q., Pastor-Pareja, J.C., 2015. Plasma membrane overgrowth causes fibrotic collagen accumulation and immune activation in Drosophila adipocytes. Elife 4, e07187. doi:10.7554/eLife.07187		Pepck1	ND-49L	CG2059	CG13096		SmF	HDAC1	Z600			prc				Cdc42	CG13492			CG4860				l(2)efl	CG11267	Rtc1
Hydroxyproline production	Figure 2-figure supplement 3H, I	Rappu P, Salo AM, Myllyharju J, Heino J. 2019. Role of prolyl hydroxylation in the molecular interactions of collagens. Essays in biochemistry 63: 325-335.		Pepck2	ND-51	CG2691	RpLP0-like		Dhod	Gcn5	Xpd			Pis				Cdep	CG13912			CG4594				Hsp70Aa	CG11779	CG3071
Basement membrane secretion	Figure 2-figure supplement 3H	Devergne, O., Tsung, K., Barcelo, G., Schüpbach, T., 2014. Polarized deposition of basement membrane proteins depends on Phosphatidylinositol synthase and the levels of Phosphatidylinositol 4,5-bisphosphate. Proc Natl Acad Sci USA 111, 7689–7694. doi:10.1073/pnas.1407351111 and Norum, M., Tång, E., Chavoshi, T., Schwarz, H., Linke, D., Uv, A., Moussian, B., 2010. Trafficking through COPII stabili…		l(1)G0156	ND-51L1	CG30349	CG12301		Hr3	CtBP	Tctp			Mmp2				CG10188	CG13917			CG3902				Hsp70Ab	CG15093	Nmd3
Ras protein signal transduction	Figure 1-figure supplement 3A; Figure 2-figure supplement 3H	GO:0007265		Idh3b	ND-51L2	CG3085	CG18600		dpp	Hey	Skp2			Ehbp1				CG15399	CG14196							Hsp70Bb	CG1628	CkIIbeta2
Sugarbabe dependent genes	Figure 3A; Figure 3-figure supplement 1E	Zinke, I., Schütz, C.S., Katzenberger, J.D., Bauer, M., Pankratz, M.J., 2002. Nutrient control of gene expression in Drosophila: microarray analysis of starvation and sugar-dependent response. EMBO J. 21, 6162–6173. doi:10.1093/emboj/cdf600		Pdhb	ND-75	CG31381	nudC		ecd	Atx-1	Sap30			Mmp1				CG15611	CG14630							Hsp70Bc	CG31229	nop5
Pentose phosphate pathway	Figure 3A	Custom gene lists made by Mark Sharpley in our lab modified from Drosophila metabolism gene lists by Jason Tennessen			ND-ACP	CG31759	CG5033		Edg78E	aph-1	Rint1			Mp				CG18659	CG14820							Fkbp12	CG3156	l(1)G0045
Peroxisomal FAO	Figure 3-figure supplement 1D	Custom gene lists made by Mark Sharpley in our lab modified from Drosophila metabolism gene lists by Jason Tennessen			ND-AGGG	CG32409	CG4554		eg	CG6843	RecQ4			LanB1				CG2113	CG1532							Torsin	CG5037	drosha
Mitochondrial FAO	Figure 3-figure supplement 1D	Custom gene lists made by Mark Sharpley in our lab modified from Drosophila metabolism gene lists by Jason Tennessen			ND-ASHI	CG3594	l(1)G0020		ena	Nct	Rad17			Sec23				CG30440	CG15534							jdp	CG5599	l(1)G0020
Fatty acid synthesis	Figure 3-figure supplement 1D	Custom gene lists made by Mark Sharpley in our lab modified from Drosophila metabolism gene lists by Jason Tennessen			ND-B12	CG4038	CG11076		e(y)1	Tace	Prp38			Sec24CD				CG30456	CG16935							Fkbp59	CG7430	Nxt1
Glycerolipid remodeling/Lipid signaling	Figure 3-figure supplement 1D, F	Custom gene lists made by Mark Sharpley in our lab modified from Drosophila metabolism gene lists by Jason Tennessen			ND-B14	CG42672	Rrp45		fog	pen-2	Pk34A			LanB2				CG31935	CG17221							HIP-R	CG7430	Non1
autophagy-related complexes	Figure 3-figure supplement 1D, F-G	FBgg0000216			ND-B14.5A	CG5114	Rrp46		fy	nej	PEK			PI4KIIIalpha				CG33288	CG17571							CG2887	CG7430	NHP2
Chaperone-mediated protein folding	Figure 3-figure supplement 1D, G	GO:0061077			ND-B14.5B	CG5535	Ski6		fzy	Psn	Myt1							CG34393	CG18327							Nrd1	CG8199	CG3527
srl-dependent genes	Figure 3C	Tiefenböck, S.K., Baltzer, C., Egli, N.A., Frei, C., 2010. The Drosophila PGC-1 homologue Spargel coordinates mitochondrial activity to insulin signalling. EMBO J. 29, 171–183. doi:10.1038/emboj.2009.330			ND-B14.7	CG5599	P32		Gapdh2		Myb							CG3630	CG18765							CG14207	CG8993	CG7246
ribosome biogenesis	Figure 3C; Figure 1-figure supplement 3A	KEGG:03008			ND-B15	CG5728	Non3		Gpdh1		Mfap1							CG42674	CG30265							CG5001	COX4	CG2972
					ND-B16.6	CG6550	CG6712		Grd		JMJD5							CG43102	CG31265							CG13133	COX5A	CG9107
					ND-B17	CG7414	Nnp-1		GstD1		Hus1-like							CG43658	CG32379							Tpr2	COX5B	Rat1
					ND-B17.2	CG7637	ppan		h		Dsor1							CG4789	CG32444							Sgt	COX7A	CG13097
					ND-B18	CG8097	CG1542		Hex-A		CycB3							CG4853	CG32625							mrj	COX7C	CG5776
					ND-B22	CG8132	CG3756		ImpL1		CycB							CG5522	CG32750							CG12020	Cyt-c-p	CG9422
					ND-MLRQ	CG8414	Rbm13		janB		Claspin							CG5937	CG32751							CG7409	Cyt-c1	CG1671
					ND-MNLL	CG8545	Ns1		kar		Cdk2							CG6607	CG34136							CG7182	EndoG	CG7637
					ND-MWFE	CG8939	CG7006		knrl		Cdk1							CG7369	CG3635							CG4461	Fdx2	CG12325
					ND-PDSW	CG9253	Mat89Ba		egh		Cdc6							CG8907	CG3987							CG11267	GatB	CG13185
					ND-SGDH	CG9630	CG3071		dlg1		CG5921							CG9098	CG5853							CNPYb	Hsp60B	Ak6
					ATPsynB	CG9799	l(2)34Fd		Cyp303a1		CG5003							Cka	CG6125							CG7130	Mccc1	CG4866
					ATPsynC	Dbp73D	pit		AspRS		CG15602							cnk	CG6287							CG3061	Mccc2	Ns2
					ATPsynCF6	Dis3	CG11920		sas		CG14937							Crag	CG6574							CG9920	ND-18	eIF6
					ATPsynD	Elp1	hoip		RpLP1		CG14102							CRMP	CG7084							CG30156	ND-19	CG8549
					ATPsynE	Elp2	RpI135		mei-S332		CG13088							cta	CG7900							RIC-3	ND-20	CG8038
					ATPsynF	Fib	l(3)07882		mei-W68		CG11839							cv-c	CG8299							Hsp70Bbb	ND-23	RIOK1
					ATPsynG	Fkbp12	Hsp83		Men		Aven							dos	CG9416							CG32640	ND-24	Ran-like
					ATPsynO	Fkbp39	Hsp60A		msl-3									drk	CG9485							CG32641	ND-30	CG12301
					ATPsynbeta	Hsc70-5	bor		Acp26Ab									Efa6	Cip4							HIP	ND-42	CG7728
					ATPsynbetaL	Ip259	CG11267		Mst87F									Epac	Cln7							Ero1L	ND-49	CG14057
					ATPsyndelta	La	Hsc70Cb		MtnB									Exn	Cyp28d2							DnaJ-1	ND-51	CG10909
					ATPsynepsilonL	Mat89Ba			nec									Fgop2	Cyp311a1							sel	ND-75	CG9799
					ATPsyngamma	NHP2			or									Fnta	Cyp4ac3							Hsc70-4	ND-ACP	Ns1
					COX4	Nacalpha			ord									CG1657	Cyp6a23								ND-ASHI	CG8064
					COX4L	Nap1			osk									garz	Cyp9f3								ND-B14	Nop56
					COX5A	Nnp-1			ovo									GEFmeso	Desat1								ND-B14.5A	CG10214
					COX5B	Non1			CG9757									Graf	Egfr								ND-B14.5B	CG11920
					COX6B	Nop56			Pp1alpha-96A									Hmgcr	FASN1								ND-B16.6	RIOK2
					COX7A	Nop60B			Ras64B									ksr	FASN2								ND-B17.2	CG12877
					COX7C	Nopp140			sala									Lrr47	Galk								ND-B18	Ste12DOR
					COX8	Nph			sev									CG3711	Gk1								ND-B22	CG30349
					UQCR-11	Ns1			sisA									mbc	GlyP								ND-MLRQ	nxf4
					UQCR-11L	Nsun5			sl									Miro	Indy								ND-MNLL	CG33158
					UQCR-14	RIOK1			spir									Mob4	Irp-1B								ND-PDSW	Ste:CG33236
					UQCR-6.4	RNaseZ			Sry-alpha									Mtl	Jon74E								ND-SGDH	Ste:CG33237
					UQCR-C1	RpI135			Sry-beta									Nf1	Jon99Ciii								OXA1L	Ste:CG33238
					UQCR-C2	RpL10			st									Pak	Letm1								P32	Ste:CG33239
					UQCR-Q	RpL10Ab			su(sable)									pbl	Lim3								Pdhb	Ste:CG33240
						RpL11			sw									PlexA	Lk6								Prx3	Ste:CG33241
						RpL13			tld									PlexB	Mdr49								Roe1	Ste:CG33242
						RpL14			tor									Plzf	Men								SCOT	Ste:CG33243
						RpL17			Treh									pns	Mmp2								Scox	Ste:CG33244
						RpL18			betaTub60D									Pp1-87B	None								SdhC	Ste:CG33245
						RpL21			tud									PsGEF	Npc1b								SdhC	Ste:CG33246
						RpL22			RpS27A									Pura	Obp83ef								SdhD	Ste:CG33247
						RpL23A			usp									Rab1	Pdha								SdhD	5SrRNA:CR33353
						RpL24			v									Rab10	Prestin								Sod2	5SrRNA:CR33354
						RpL24-like			vir									Rab11	Root								Tim10	5SrRNA:CR33355
						RpL29			Vm26Aa									Rab14	Sclp								Tim8	5SrRNA:CR33357
						RpL3			vn									Rab18	Sod3								Tom40	5SrRNA:CR33358
						RpL30			y									Rab19	Spn55B								UQCR-14	5SrRNA:CR33359
						RpL34b			nAChRbeta2									Rab2	Srr								UQCR-6.4	5SrRNA:CR33360
						RpL41			Mst84Da									Rab21	Syx13								UQCR-C1	5SrRNA:CR33361
						RpL5			Mst84Db									Rab23	Toll-9								UQCR-C1	5SrRNA:CR33362
						RpL6			Mst84Dc									Rab26	Tps1								UQCR-C2	5SrRNA:CR33364
						RpL7			Ser									Rab27	Tret1-1								bonsai	5SrRNA:CR33365
						RpL9			rhi									Rab3	UGP								cype	5SrRNA:CR33366
						RpLP0-like			LysP									Rab3-GEF	Ugt303A1								dnk	5SrRNA:CR33367
						RpS10b			LysX									Rab30	Ugt303B3								fh	5SrRNA:CR33368
						RpS13			Ubc6									Rab32	amn								levy	5SrRNA:CR33369
						RpS14a			Su(P)									Rab35	bgm								mEFTu1	5SrRNA:CR33370
						RpS15Aa			Fur1									Rab39	cN-IIIB								mRpL3	5SrRNA:CR33372
						RpS16			Ets97D									Rab4	deltaTry								mRpS16	5SrRNA:CR33373
						RpS2			dy									Rab40	dmGlut								mRpS17	5SrRNA:CR33374
						RpS20			Gad1									Rab5	et								mRpS25	5SrRNA:CR33375
						RpS23			Eig71Ea									Rab6	fbp								mRpS6	5SrRNA:CR33376
						RpS24			rho									Rab7	fusl								mtSSB	5SrRNA:CR33377
						RpS25			Rap1									Rab8	gukh								muc	5SrRNA:CR33378
						RpS26			hh									Rab9	mdy								ox	5SrRNA:CR33379
						RpS27			Ccp84Ac									Rab9D	pst								porin	5SrRNA:CR33380
						RpS27A			inaC									Rab9Db	spict								sesB	5SrRNA:CR33381
						RpS28b			Su(H)									Rab9E	spn-D								tko	5SrRNA:CR33382
						RpS30			Bx42									Rab9Fa	sug									5SrRNA:CR33383
						RpS4			tok									Rab9Fb										5SrRNA:CR33384
						RpS5a			gol									Rabex-5										5SrRNA:CR33385
						RpS7			phm									RabX1										5SrRNA:CR33386
						RpS8			Sox14									RabX2										5SrRNA:CR33387
						Rpb5			ple									RabX4										5SrRNA:CR33388
						Sam-S			wdn									RabX5										5SrRNA:CR33389
						SpdS			Pabp2									RabX6										5SrRNA:CR33390
						Surf6			Orc3									Rac1										5SrRNA:CR33391
						TTLL4A			Ets21C									Rac2										5SrRNA:CR33392
						Tsr1			Crys									RacGAP84C										5SrRNA:CR33393
						U3-55K			GstD2									Raf										5SrRNA:CR33394
						Ufd1-like			alpha-Cat									Rala										5SrRNA:CR33395
						Uhg1			Klc									Rap1										5SrRNA:CR33396
						Uhg2			Ssrp									Rap2l										5SrRNA:CR33397
						Uhg4			bys									Ras64B										5SrRNA:CR33398
						Uhg5			brat									Ras85D										5SrRNA:CR33399
						Uhg7			CycJ									CG42684										5SrRNA:CR33400
						bys			Nc73EF									Rcc1										5SrRNA:CR33401
						eEF1beta			htl									Rgl										5SrRNA:CR33402
						eEF1delta			TpnC47D									Rho1										5SrRNA:CR33403
						eEF2			mtrm									RhoBTB										5SrRNA:CR33404
						eIF6			wal									RhoGAP100F										5SrRNA:CR33405
						hoip			l(2)05714									RhoGAP19D										5SrRNA:CR33406
						l(1)G0004			Chchd3									RhoGAP1A										5SrRNA:CR33407
						l(1)G0045			msn									RhoGAP68F										5SrRNA:CR33408
						l(2)05287			l(3)07882									RhoGAP71E										5SrRNA:CR33409
						l(2)34Fd			eff									RhoGAP92B										5SrRNA:CR33410
						l(2)k09022			Sema1a									RhoGAPp190										5SrRNA:CR33411
						l(3)07882			Obp28a									RhoGDI										5SrRNA:CR33412
						mRpS14			RyR									RhoGEF2										5SrRNA:CR33413
						mRpS17			TfIIA-L									RhoGEF3										5SrRNA:CR33414
						mod			l(2)efl									RhoGEF4										5SrRNA:CR33415
						msk			ND-SGDH									RhoGEF64C										5SrRNA:CR33417
						nop5			l(3)neo43									RhoL										5SrRNA:CR33418
						r			Acp36DE									RhoU										5SrRNA:CR33419
						srl			e(r)									Ric										5SrRNA:CR33420
						vas			La									Rich										5SrRNA:CR33421
						vig			Mst57Db									rin										5SrRNA:CR33422
									EbpIII									Rlip										5SrRNA:CR33423
									Arp53D									Rok										5SrRNA:CR33424
									Dp									RtGEF										5SrRNA:CR33425
									Irbp									S6kII										5SrRNA:CR33426
									AcCoAS									Sbf										5SrRNA:CR33427
									Nmda1									Sec71										5SrRNA:CR33428
									nSyb									sif										5SrRNA:CR33429
									TfIIA-S									siz										5SrRNA:CR33430
									Pex1									Slmap										5SrRNA:CR33431
									Nrx-IV									smt3										5SrRNA:CR33432
									Ask1									Sos										5SrRNA:CR33433
									Rac2									Spec2										5SrRNA:CR33434
									Rlb1									spri										5SrRNA:CR33435
									gcm									step										5SrRNA:CR33436
									sty									Strip										5SrRNA:CR33437
									Eig71Ej									sty										5SrRNA:CR33438
									Hr38									Sur-8										5SrRNA:CR33439
									btn									tor										5SrRNA:CR33440
									AhcyL2									trio										5SrRNA:CR33441
									Cyp9b2									tum										5SrRNA:CR33442
									Diap2									Uba1										5SrRNA:CR33443
									Orc5									Unc-89										5SrRNA:CR33444
									CG2034									vap										5SrRNA:CR33445
									Rme-8									Vav										5SrRNA:CR33446
									alpha-Est10									Zir										5SrRNA:CR33447
									alpha-Est9									Ziz										5SrRNA:CR33448
									Apc																			5SrRNA:CR33449
									Lis-1																			5SrRNA:CR33450
									nrv2																			5SrRNA:CR33451
									Rab19																			5SrRNA:CR33452
									Rab7																			Rpp20
									Reg-5																			CG40635
									crq																			18SrRNA:CR41548
									lbm																			l(2)k09022
									Tom40																			5.8SrRNA:CR40454
									NaPi-T																			SteXh:CG42398
									Pitslre																			Nop60B
									Pino																			CG4806
									smid																			Mat89Ba
									gcm2																			wcd
									stck																			Nxf3
									lush																			l(3)72Dn
									ko																			CkIIalpha
									drongo																			Ns3
									dve																			18SrRNA:CR45838
									Idgf2																			5.8SrRNA:CR45839
									Idgf1																			18SrRNA:CR45841
									emb																			5.8SrRNA:CR45842
									CLIP-190																			28SrRNA:CR45844
									Acp62F																			5.8SrRNA:CR45852
									Pkn																			Rpp30
									Osbp																			prage
									nudC																			l(2)05287
									l(2)k05819
									Gpo1
									CG1910
									Tsf1
									Cht4
									Hel89B
									melt
									dimm
									caps
									B4
									sip1
									foi
									Fim
									Sirt1
									Tsp2A
									CG11417
									Lip2
									Flo1
									Dbp80
									b6
									CG3777
									Ip259
									CG14795
									Cyp6g1
									SF1
									Pli
									Rtca
									CG4313
									CG32812
									ND-B14.5A
									Meics
									Tip60
									tyf
									dgt4
									CG14812
									mei-P26
									gus
									bonsai
									bip1
									Ugt35a
									Tsc1
									Tak1
									RpII33
									Or47b
									Or43a
									Or22a
									Hmg-2
									alpha-Man-IIb
									l(1)G0045
									Ugt37b1
									Tehao
									Thd1
									Eb1
									ThrRS
									LeuRS-m
									ArgRS
									Dyrk3
									Inx7
									Inx2
									Gmap
									l(1)G0020
									wdb
									EDTP
									Tnks
									Ublcp1
									CG8108
									cert
									CG5867
									jdp
									Cpsf100
									NimB1
									Akap200
									msps
									Ptpmeg2
									He
									rtet
									CG6424
									CG3530
									CG9254
									CG5888
									CG18507
									Sec71
									Eato
									sut2
									qsm
									Rpn5
									Rpn1
									CG18109
									CG16890
									Kebab
									CG14478
									mthl3
									Spn55B
									onecut
									miple2
									ced-6
									Tollo
									Patsas
									COQ7
									CG2901
									CG15239
									Glos
									CG3556
									CG12680
									CG15465
									CG15784
									CG12730
									CG3097
									CG3108
									Usp30
									CG6067
									Grip
									CG15892
									CG3815
									CG3823
									CG3842
									ND-B16.6
									CG3168
									Nf-YC
									CG12541
									CG9657
									Rab39
									CG10920
									UbcE2H
									CG12123
									CG12112
									CG12772
									CG1789
									Zpr1
									CG12056
									CG1468
									CG9686
									CG2157
									CG1537
									CG15199
									CG15202
									Or10a
									CG2444
									CG9360
									sicily
									Upf1
									Sclp
									Ir11a
									Rab40
									CG15721
									dmrt11E
									CG14410
									CG12539
									CG14406
									CG12398
									PPYR1
									CG12608
									CG6227
									CG11655
									CG6299
									CG15643
									CG8134
									Mvd
									CG8260
									CG8952
									PGRP-LE
									CG9170
									CG8931
									CG12395
									dpr18
									CG4301
									AnxB11
									CG9947
									rngo
									CG9676
									spheroide
									CG12998
									CG5172
									CG8675
									CG12992
									CG8188
									Mvb12
									Pgant7
									Cyp308a1
									CG7322
									CG7378
									Mec2
									CG14195
									Mur18B
									CG12655
									CG9572
									CG12679
									CG15459
									CG1314
									Stt3A
									bves
									CG1722
									CG10918
									CG14618
									CG12446
									galectin
									CG11617
									CG13693
									CG17075
									CG3345
									CG13690
									shv
									cold
									CG12506
									CG4291
									CG5397
									CG15387
									Send1
									Hrs
									CG9961
									aph-1
									CG15399
									CG18557
									Prx6005
									CG9641
									SerRS
									CG17260
									CG17593
									IM33
									CG3407
									CG15423
									CG3652
									Ir25a
									mRpS2
									CG11149
									obst-E
									CG9500
									CG11050
									DIP-iota
									Nse1
									LUBEL
									Nha1
									CG18304
									Caper
									CG6739
									CG13794
									Spn28Dc
									PAPLA1
									SLC5A11
									CG8419
									CG8349
									CG8292
									Scgalpha
									CG13096
									CG9287
									CG9289
									Tsp29Fb
									CG9568
									nAChRalpha6
									TbCMF46
									CG5853
									CG5731
									CG5708
									CG7384
									CG18302
									CG17134
									CG12517
									Wdr59
									Reps
									Tom70
									CG6405
									CG5776
									CG6180
									DnaJ-H
									Sfmbt
									CG5439
									CG16972
									kek4
									Mabi
									CG5945
									Ance-3
									CG4650
									CG15258
									CG13258
									yellow-b
									CG15141
									CG15142
									CG15145
									Oli
									CG6870
									CG15153
									CG15152
									CG15155
									CG5783
									kon
									CG10338
									mRpL13
									CG10137
									CG10337
									CG13078
									CG10366
									CG10628
									CG10463
									Cdc23
									CG17472
									CG14402
									CG14400
									CG9336
									Mondo
									CG3107
									CG10465
									TpnC4
									scaf
									SCAP
									CG7856
									CG11211
									CG15233
									CG9410
									PGAP3
									Zip42C.2
									CG15236
									Spn42De
									Cyp6u1
									Tsp42Ek
									CG11127
									CG12826
									CG1941
									CG1946
									azot
									CG11191
									Nup50
									CG2121
									Cyp4ad1
									Cirl
									MrgBP
									CG13747
									CG8078
									CG8046
									Rad51D
									CG13739
									CG1888
									CG1827
									hebe
									Lsm11
									CG18446
									CG1513
									CG12912
									CG12910
									CG17765
									Elp2
									CG12934
									CG12341
									CG7222
									Spn47C
									Cpr47Ec
									Fbl6
									CG9003
									CG13198
									Sobp
									rho-7
									CG8298
									CG18343
									CG8407
									Prp8
									RpS11
									CG8854
									Vha36-2
									CG8839
									CG13160
									CG13155
									Cpr49Ac
									CG8525
									CG13321
									CG13323
									CG13325
									FLASH
									CG10799
									CG13332
									CG6209
									CG6357
									ReepB
									jef
									CG10205
									ND-51L2
									Hr51
									CG8180
									CG8299
									CG8405
									CG15706
									Tsf3
									CG9068
									CG15711
									Syn2
									CG8306
									SmydA-7
									CG11400
									Gbp1
									Gbp2
									CG10950
									veil
									ND-51L1
									CG5770
									CG10911
									CG10916
									CG14500
									GstE1
									CG5189
									List
									Mctp
									CG15080
									CG15084
									sano
									Oseg6
									Obp56a
									Obp56d
									Obp56h
									Toll-7
									CG8654
									CG13869
									Efhc1.2
									CG13868
									Obp57c
									Lrt
									galla-1
									CG9344
									CG10527
									CG15661
									CG17974
									CG15673
									CG15674
									CG10321
									CG13492
									CG4377
									CG4372
									CG13494
									CG2921
									CG11073
									CG6613
									CG11269
									CG6758
									Vps35
									CG3292
									wdp
									CG6044
									gas
									CG17807
									CG13510
									CG13511
									CG9826
									CG9890
									CG3085
									CG13545
									Ice1
									yellow-d2
									pita
									Eglp1
									sigmar
									CG5539
									CG5543
									Snap29
									CG5597
									Upf3
									PPP1R15
									CG3860
									Naa35
									Ir60a
									CG3376
									Ir60e
									CG13585
									Mmp1
									SiaT
									CG3650
									CG16896
									CG9083
									Tpc2
									CG13405
									mthl10
									CG3386
									hiro
									CG13895
									tfc
									CG2211
									Pcyt2
									CG12104
									CG18170
									CG33791
									CG12105
									CG7970
									CG12035
									PIG-Wb
									Gk2
									CG13921
									Cpr62Bc
									CG12024
									dsb
									CG5687
									CG16758
									CG14949
									CG1246
									AhcyL1
									Alg2
									CG14958
									CG10862
									ntc
									IntS10
									CG1136
									Chd64
									CG1299
									Fdx2
									DopEcR
									Syx17
									CG15021
									CG11345
									Fitm
									Lkr
									CG6462
									CG13300
									Cpr65Ea
									Cpr65Ec
									CG8629
									CG15829
									CG14829
									CG8560
									CG8539
									CG7548
									CG7546
									PGRP-SD
									CG8492
									Snmp2
									CG13679
									CG7201
									BI-1
									CG6638
									CG6576
									CG13311
									TrpA1
									CG13313
									CG5021
									CG13314
									Dhpr
									CG4461
									Ir67a
									CG3306
									CG6707
									CG14153
									CG7839
									Iyd
									GlcAT-P
									CG7607
									CG14141
									CG6168
									CG6149
									CG12289
									CG14137
									Dph1
									crim
									Muc68D
									viaf
									CG17154
									eIF3l
									CG11529
									Ncc69
									CG10638
									CG10984
									CG11263
									CG11267
									mRpL20
									CG14107
									CG10222
									CG10154
									CG10725
									CG10140
									CG10089
									ssp2
									CG13482
									CG18649
									EAChm
									CG13454
									SCCRO
									CG15715
									CG13075
									CG13074
									ATPsynbetaL
									MED10
									CG13049
									CG13043
									CG13063
									CG13058
									Gagr
									CG11905
									Ilp8
									beg
									CG13733
									Oatp74D
									CG5577
									Sgf11
									CG12477
									CG14096
									CG12519
									CG18294
									CG9452
									Usp32
									Mtr3
									hale
									CG7328
									obst-F
									CG6996
									CG12971
									Syx6
									P5CDh1
									CG14561
									ND-B14.5AL
									CG11370
									CG11367
									aux
									CG14642
									Suv3
									CG2604
									Cerk
									Pi4KIIalpha
									Hat1
									CG2046
									CG2023
									NPFR
									CG15597
									CG15594
									Hr83
									CG1105
									CG1965
									Tailor
									CG14605
									CG10086
									CG3014
									CG10435
									Pbp95
									CG11035
									Or85a
									Cyp313b1
									CG8043
									CG11755
									CG8112
									ranshi
									Ir85a
									CG9427
									CG8319
									Fst
									CG8478
									CG8481
									topi
									CG8534
									Art4
									Npc2c
									CG5361
									CG12592
									CG18545
									CG4073
									Cap-H2
									Tengl4
									CG4706
									scpr-C
									CG17187
									CG17721
									ninaG
									CG6808
									CG14711
									CG14731
									ATP8B
									CG18549
									Dtg
									CG10126
									timeout
									CG8476
									Adgf-D
									Adgf-C
									CG14362
									CG9920
									CG14357
									CG9649
									CG8066
									CG3987
									Mf
									AOX2
									AOX3
									CG5399
									CG4520
									sxe2
									Gr89a
									CG17560
									Arl6IP1
									Irc
									AdSL
									CG4009
									CG5255
									CG5866
									CG7655
									pasi1
									CG14317
									CG14304
									CG14301
									CG7708
									Epg5
									CG14292
									EndoA
									CG3517
									Scsalpha2
									CG6231
									subdued
									CG6195
									CG4662
									CG4360
									Sirt2
									Or92a
									CG4000
									Syp
									Usp8
									cDIP
									CG16791
									CG7907
									CG5849
									Sar1
									CG7059
									CG13855
									CG12499
									Pebp1
									tHMG1
									CG6937
									CG17625
									Cyp6d4
									CG4723
									Gbp3
									CG17121
									p53
									CG17109
									CG4393
									Ir94g
									Ir94h
									Irk2
									CG10182
									CG10183
									GILT2
									CG16710
									RpS19b
									AP-1sigma
									CG13604
									CG18428
									CG13605
									Root
									CG6178
									Spps
									CG13615
									CG13627
									CG13630
									CG13634
									CG11168
									Mocs2B
									Cad96Cb
									CG11854
									alrm
									Vps33B
									XNP
									CG5116
									CG5079
									CG5071
									alpha4GT2
									CG14551
									CG12290
									CG6403
									CG14247
									IntS12
									CG6295
									Nep5
									CG17991
									TTLL6B
									CG5402
									CG13972
									CG12885
									CG5639
									CG12428
									CG12877
									CG4849
									aqrs
									CG1646
									beta4GalNAcTB
									Rnb
									Vps16B
									CG15515
									Capa
									CG15522
									CG15531
									CG15534
									CG15537
									CG9698
									eIF4H2
									CG11318
									CG1542
									CG3669
									nyo
									pasha
									CG1815
									CG1890
									CG1896
									sip3
									Ir100a
									yip3
									tara
									lectin-46Cb
									cmet
									cana
									Ugt36Ba
									Aplip1
									Gclc
									GNBP2
									Tsp3A
									Seipin
									CG3021
									CG14625
									CG11398
									Unc-76
									CG7763
									CG18673
									CG13516
									CG14664
									CG14645
									CG13177
									CG12158
									karr
									CG13038
									CG8012
									CG15577
									Muc26B
									CG6115
									Gr94a
									Gr59d
									Or65b
									CG15107
									tral
									Tsp42Eb
									CG13773
									CG18754
									CG18869
									CG13713
									bchs
									cbt
									Obp57b
									CG32032
									mask
									Ilp3
									Gr93c
									Gr22d
									Gr22a
									Gr10a
									bin
									btz
									Takl1
									CG33939
									CG32276
									Cpr49Aa
									Tmem18
									CG30082
									CG30087
									CG30095
									NT5E-2
									CG30109
									CG30120
									CG30151
									CG30160
									CG30269
									CG30273
									CG30281
									CG30285
									CG30286
									CG30340
									Prp38
									CG30355
									CG30357
									Asap
									CG30384
									CG30394
									Rpi
									CG30461
									ste24c
									CG30472
									CG30479
									CG30486
									CG31016
									CG31028
									ppk31
									CG31077
									CG31104
									ppk22
									CG31115
									ClC-a
									Slimp
									Efa6
									CG31219
									CG31230
									CG31231
									CG31259
									CG31279
									CG31313
									HEATR2
									CG31323
									CG31342
									CG31365
									sals
									Ir94c
									CG31437
									CheB93b
									CG31454
									CG31464
									CG31469
									CG31496
									nolo
									CG31635
									CG31659
									CG31668
									CG31687
									CG31709
									CG31710
									CG31729
									CG31730
									CG31760
									CG31855
									CG31867
									CG31869
									CG31909
									CG31960
									Cpr66D
									scramb1
									Ir67c
									CG32091
									Vps13D
									CG32182
									825-Oak
									CG32213
									CG32214
									ND-MLRQ
									CG32241
									Claspin
									CG32263
									Drsl2
									Drsl3
									Mrtf
									CG32373
									CG32407
									CG32457
									Tengl2
									CG32512
									CG32564
									CG32573
									be
									CG32633
									Muc11A
									CG32679
									CG32681
									CG32698
									CG32793
									CG32834
									CG32986
									eIF4EHP
									dpy
									CG33229
									CG33252
									CG33284
									CG33288
									CG33310
									Sp212
									CG33341
									CG33465
									CG33474
									CG33500
									CG33648
									CG33770
									CG33978
									Mid1
									CG33995
									CG34002
									CG34027
									CG34034
									CG34056
									CG34057
									GstE9
									GstE5
									GstE2
									GstE10
									dyl
									GlcT
									IM18
									CG40485
									CG33947
									CG34136
									CG17672
									CG34159
									CG34165
									CG34169
									CG34176
									CG34188
									CG34194
									CG34198
									CG34213
									CG34265
									Cpr65Ay
									CG34273
									CG34278
									CG34299
									CG34300
									CG34301
									CG34305
									CG34337
									Pde11
									CG34345
									Rgk3
									NKAIN
									CG34431
									CG34437
									lap
									Mst36Fa
									Plp
									iav
									step
									Vps36
									psidin
									Vrp1
									CG42235
									CG34222
									CG33308
									CG17575
									pot
									Ir60d
									Mlp60A
									Pka-R1
									Mob4
									DNApol-alpha60
									CG42364
									CG42365
									CG42370
									CG42382
									loopin-1
									CG34229
									kuz
									CG42487
									CG42488
									CG17570
									NimC4
									Mocs2A
									CG42512
									mtg
									CG10332
									Indy-2
									CG32295
									dl
									Diap1
									l(3)76BDm
									CG3281
									mfas
									Ect3
									CG5004
									CG42565
									Trs23
									CG42583
									wol
									Sfp36F
									Cpsf73
									Sytalpha
									Alh
									CG42615
									CheA84a
									verm
									PPO3
									SdhA
									slim
									nero
									CG42656
									ms(2)34Fe
									l(2)34Fc
									CG42674
									Thor
									RpS6
									RpS24
									RpL8
									Axud1
									tinc
									tweek
									Cpn
									SmD2
									CG42762
									CG42781
									CG42789
									CG42797
									mid
									RASSF8
									CG42811
									CG42816
									CG42825
									CG42833
									CG42834
									Csk
									Sik3
									f
									kibra
									CG42867
									CG9932
									CG43057
									Vha44
									VhaPPA1-2
									Rab8
									CG43082
									CG43084
									CG43095
									CG43098
									CG43107
									CG43110
									SmydA-3
									pyd
									Tmhs
									CG43153
									dtn
									CG43202
									CG43248
									cnc
									CG43317
									CG43319
									CG43325
									CG43326
									CG43328
									CG43330
									CG43333
									CG43336
									CG43355
									CG43362
									CG43373
									mEFG1
									Nxf3
									robls54B
									Phae1
									CG43427
									hts
									Uck
									Lpin
									Hmgcr
									CG43702
									sick
									COX8
									jvl
									ebi
									CG43736
									CG43739
									bru3
									Cnx14D
									CG43773
									CG43774
									CG43797
									CG43880
									CG43896
									CG17646
									CG43901
									RhoGEF3
									CG43982
									CG44002
									AP-2alpha
									eIF4E3
									Oseg1
									Spn42Da
									CG44247
									CG44250
									CG44251
									sud1
									PIG-S
									Inx3
									CG44433
									CG44477
									CG44532
									CrebB
									Zasp52
									rg
									CG45075
									CTPsyn
									CG45079
									SclA
									SclB
									Gp210
									Exo84
									Sec5
									Sec6
									hog
									EloC
									Esyt2
									Sf3a1
									CG45486
									CG45487
									Topors
									sau
									kl-5
									vib
									CG4836
									LIMK1
									CG46307
									CG46318
									Ttd14
									CG46338
									DNAlig3
